# Supplementary material for: The International Space Station Environment Triggers Molecular Responses in Aspergillus niger
Source: Front Microbiol. 2022 Jun 30;13:893071. doi: 10.3389/fmicb.2022.893071 (PMC9280654; doi:10.3389/fmicb.2022.893071)
Supplement: Supplementary file 2 [file Table_2.XLSX]

## Sheet: Sheet1
Supplementary Table ST2. Identified INDELs when compared to CBS 513.88
Chromosome	Position	Flanking	Type	Gene/Nearest gene	CBS 513.88	Alteration	JSC-093350089 control	JSC-093350089 ISS-grown
I	53800	TTTTTTTTTTTTTTTTTTTT	intergenic	An01g00210	TTTTTTTTTTTTTTTTTTTTTTTTTGG	[T]	TTTTTTTTTTTTTTTTTTTTTTTTTGG/	T/		INDEL in both strains
I	60596	CCTTGAGGTATGTCAAGATG	intergenic	An01g00240	A	[ACATAATATCCAACCCCAGAC, ACATAATATCCAACCCCAGACTGAAACAGAAGCTATACGTATGAGGACTTGACGGGAGGTCGTTC]	ACATAATATCCAACCCCAGAC/	ACATAATATCCAACCCCAGACTGAAACAGAAGCTATACGTATGAGGACTTGACGGGAGGTCGTTC/		INDEL in ISS-grown strain
I	159332	GCACAACGTTGGGGGGGGGG	intergenic	An01g00640	T	[TGGGGGGGG]	T/	TGGGGGGGG/		INDEL in control strain
I	180824	TGTACCGGGCANNNNNNNNN	intergenic	An01g00740	C	[CATGGTAGAGCTGATCGAAGTTCACTAGGTTGCATTTTATGTATTTCAACTTGCGTCGAGTCTCTATGGGCTGATCACGGATTGGAATAGCATGGAGGATGCTAAGAAAGCAGTGGT]	C/	CATGGTAGAGCTGATCGAAGTTCACTAGGTTGCATTTTATGTATTTCAACTTGCGTCGAGTCTCTATGGGCTGATCACGGATTGGAATAGCATGGAGGATGCTAAGAAAGCAGTGGT/
I	183798	GATCAGCAAGAAAAAAAAAA	intergenic	An01g00750	GAAAAAAAAAAAAAAAAAAAAAA	[G]	GAAAAAAAAAAAAAAAAAAAAAA/	G/
I	245754	CAAAAAAAAAAAAAAAAAGA	intergenic	An01g01030	A	[AGT]	A/	AGT/
I	245765	AAAAAAAGAAGAAGAAGAAG	intergenic	An01g01030	AGAAGAAGAAGAAC	[A]	AGAAGAAGAAGAAC/	A/
I	280512	AGGAGTCCAGCCCCCCTATC	disruptive inframe insertion	An01g01160	G	[GCTCCCCCCCCCCCCCCCCCCCCCCCCC]	G/	GCTCCCCCCCCCCCCCCCCCCCCCCCCC/
I	280518	CCAGCCCCCCTATCTCAAAC	disruptive inframe deletion	An01g01160	CTAT	[C]	CTAT/	C/
I	417645	CAGCAGACTTTAGTCGCCTT	intergenic	An01g01730	T	[TACAA]	TACAA/	T/
I	441495	GCCATGACATCCCTGCCTAC	disruptive inframe deletion	An01g01850	TCCC	[T]	TCCC/	T/
I	441575	ACTGTCACTGAGAAAAGGGG	frameshift variant	An01g01850	G	[GAA]	G/	GAA/
I	441584	GAGAAAAGGGGTTATGCCAA	frameshift variant	An01g01850	GGT	[G]	GGT/	G/
I	482994	AGTCCTCGACTGGGCCCAGG	frameshift variant	An01g02030	CTG	[C]	CTG/	C/
I	562705	AGTACCCCAGAAAAAGGCAG	frameshift variant	An01g02330	G	[GAAAAAAAAAA, GAAAAAAAAAAAAAAAAA]	GAAAAAAAAAAAAAAAAA/	GAAAAAAAAAA/
I	695058	ATACACTAAGACAAACAACT	intergenic	An01g02940	G	[GATAA]	GATAA/	G/
I	880764	CGATTCTTCTTCCTCCTCCT	disruptive inframe deletion	An01g03670	TTCCTCCTCCTCCTCCTCCTCCTCCTCCTCCTCCTCCTCCTCCTCCTCC	[T]	TTCCTCCTCCTCCTCCTCCTCCTCCTCCTCCTCCTCCTCCTCCTCCTCC/	T/
I	979857	TCTTGTTCCCTTTTTTTTTT	intergenic	An01g04150	C	[CTTT, CTTTT]	CTTT/	CTTTT/
I	990953	AATAATCTCCTTTTTTTTTT	intergenic	An01g04190	CTTTT	[C]	CTTTT/	C/
I	1140150	CGGCGCTCAACATGATTCCG	intergenic	An01g04770	AC	[A]	AC/	A/
I	1221976	AAAAAAAAAAAAATAAAAAA	intergenic	An01g05130	A	[AAAAAAAAACGAAAAAAATAAAT]	A/	AAAAAAAAACGAAAAAAATAAAT/
I	1261136	TGCGTATGTCTTTTTTCTTA	splice region variant & intron variant	An01g05290	C	[CTTTTTTTTTTTTTTTTTTT, CTTTTTTTTTTTTTTTTTTTTTTTTTTT]	CTTTTTTTTTTTTTTTTTTT/	CTTTTTTTTTTTTTTTTTTTTTTTTTTT/
I	1494706	CAGATACCGGATATATATAT	intergenic	An01g06320	G	[GAGATATATATATATAT]	G/	GAGATATATATATATAT/
I	1680664	ACTTCGGAGGAAAGGGATGG	frameshift variant	An01g07110	GAA	[G]	G/	GAA/
I	1689476	CGCACAACAGTTCACATACC	frameshift variant	An01g07140	G	[GAC]	GAC/	G/
I	1905320	TGTATATGTTTTTTTTTTTT	intergenic	An01g08080	T	[TTTTCTTTTTTCTTTTTTC]	TTTTCTTTTTTCTTTTTTC/	T/
I	1905645	TTTTCTCTCTCCCCCCCCCC	frameshift variant	An01g08070	T	[TCCCC, TCCCCCCC]	TCCCC/	TCCCCCCC/
I	2102608	AATGTAAAGCATCTATGTGA	intergenic	An01g08820	C	[CTT]	CTT/	C/
I	2419510	GTATAATTGGAATTGGAATC	intergenic	An01g10160	G	[GAAA]	G/	GAAA/
I	2419644	TCAGGCCAGTAGTACTCGAG	intergenic	An01g10160	T	[TAGTACGTACTACTGTGGGC]	T/	TAGTACGTACTACTGTGGGC/
I	2599971	TTTCCCTTTGTTTTTTTCTT	intergenic	An01g10980	G	[GTTTTTTTTTTTTTTTTTTTTTTTTTTTTTTTTTTTTTTTTTTT]	G/	GTTTTTTTTTTTTTTTTTTTTTTTTTTTTTTTTTTTTTTTTTTT/
I	2737903	GTTGCACCAGAAAAAAAACT	intergenic	An01g11630	GAA	[G]	GAA/	G/
I	2759460	TGTAATAGCACAAAGTATAT	intergenic	An01g11730	A	[ACGTATAGCTGATTGC]	A/	ACGTATAGCTGATTGC/
I	2763798	CACAGCTACTTGAATTTTGT	intergenic	An01g11720	T	[TG]	TG/	T/
I	2825837	GTTATGCAGAAAGTCTTATG	intergenic	An01g11990	AAAGTCTT	[A]	A/	AAAGTCTT/
I	2825847	AAGTCTTATGGAGACATTAG	intergenic	An01g11990	GGAGAC	[G]	G/	GGAGAC/
I	2825855	TGGAGACATTAGATGAGCCG	intergenic	An01g11990	TAGA	[T]	T/	TAGA/
I	2852990	ATCCTCAGTATTATAAGGTC	intergenic	An01g12130	A	[ATC]	A/	ATC/
I	2852994	TCAGTATTATAAGGTCAGAT	intergenic	An01g12130	TAA	[T]	TAA/	T/
I	2864750	TCAGTGGAATAGTCTAGATC	intergenic	An01g12150	TAG	[T]	T/	TAG/
I	3431717	CGGATTCCATCCCCCCCCCC	intergenic	An01g14350	T	[TTCCCCCCCCCC]	TTCCCCCCCCCC/	T/
I	3431731	CCCCCCCCCCCCATCATGCT	intergenic	An01g14350	C	[CA]	C/	CA/
I	3455661	CTCCGGTATCCTCACCAGAG	frameshift variant	An01g14440	C	[CA]	C/	CA/
I	3455700	CAGTATCATCGCCGGTATCG	frameshift variant & stop gained	An01g14440	C	[CACTA]	C/	CACTA/
I	3455701	AGTATCATCGCCGGTATCGT	frameshift variant	An01g14440	G	[GTATCGTCT]	G/	GTATCGTCT/
I	3572356	AAGGGCACAGCCCATGGAAT	intergenic	An01g14940	GC	[G]	GC/	G/
I	3572462	TGGTAGAGAACAGTGAGATA	intergenic	An01g14940	A	[AC]	A/	AC/
I	3572473	AGTGAGATATCATAACCCAT	intergenic	An01g14940	TC	[T]	TC/	T/
II	9646	CATGTATATATTGCCAGAAT	intergenic	An02g00060	ATT	[A]	ATT/	A/
II	61534	AGGTTTCCTAATCGGTTACG	intergenic	An02g00250	AATCGG	[A]	AATCGG/	A/
II	61542	TAATCGGTTACGTACACGTG	splice region variant & intron variant	An02g00260	A	[AT]	A/	AT/
II	151191	ATCCGAACGCAATTCTCACG	intergenic	An02g00680	C	[CT]	CT/	C/
II	151226	AACCCAGATTAAGACCCTAG	intergenic	An02g00680	TAA	[T]	T/	TAA/
II	151229	CCAGATTAAGACCCTAGTGT	intergenic	An02g00680	G	[GGA]	GGA/	G/
II	476075	CCTGGTCTAAGGGGGGGGTT	intergenic	An02g02080	A	[AGGGGGGGGGGGGGGGG]	A/	AGGGGGGGGGGGGGGGG/
II	565794	TGAATTCTCCAGCTTCGAAC	frameshift variant	An02g02440	CAGCT	[C]	CAGCT/	C/
II	565800	CTCCAGCTTCGAACGAGATT	frameshift variant	An02g02440	CGA	[C]	CGA/	C/
II	566205	CTCTGTGACTGAAATTCACT	intergenic	An02g02420	TG	[T]	TG/	T/
II	841318	GAGACCGGGGAAAAAAAGCG	intergenic	An02g03550	G	[GAAAAAAAAAAAAAAAAAAAAAAAAAAAAAAAAAAAAAAAAAA, GAAAAAAAAAAAAAAAAAAAAAAAAAAAA]	GAAAAAAAAAAAAAAAAAAAAAAAAAAAAAAAAAAAAAAAAAA/	GAAAAAAAAAAAAAAAAAAAAAAAAAAAA/
II	954283	TATAGTAAGTTCCCCCCCTC	splice region variant & intronvariant	An02g03990	T	[TCC]	T/	TCC/
II	998424	TTTTCTTCTCTTTTCTTATT	3 prime UTR variant	An02g04170	C	[CTTTTTTTTTTTTTTTTTTTTTTTT, CTTTTTTTTTTTTTTTTTTTTTT]	CTTTTTTTTTTTTTTTTTTTTTTTT/	CTTTTTTTTTTTTTTTTTTTTTT/
II	1066238	TCAGCACAGCTAAAGAAAAA	intergenic	An02g04400	CT	[CAAAAAAAAAAAAAAAAAAAAAAAAAAAAAAT, C]	CAAAAAAAAAAAAAAAAAAAAAAAAAAAAAAT/	C/
II	1099986	GAGAAATGCCAAAAATAAAA	intergenic	An02g04540	C	[CAACCAAAAAAAAAAAAAAAAAAAAAAAAAAA, CAACCAAAAAAAAAAAAAAAAAAAAAAAAAAAA]	CAACCAAAAAAAAAAAAAAAAAAAAAAAAAAA/	CAACCAAAAAAAAAAAAAAAAAAAAAAAAAAAA/
II	1238679	ATCGTAGCCGCCCCCCCCCC	3 prime UTR variant	An02g05250	G	[GCCCCCCC]	G/	GCCCCCCC/
II	1323012	CGCTCATGATAGAGGTTTTC	intergenic	An02g05610	TAGA	[T]	T/	TAGA/
II	1344707	CATTAGTACATACGGTAGTC	intergenic	An02g05700	ATACGG	[A]	ATACGG/	A/
II	1469613	TTGCTTTTTTTTTTTTCTTT	intergenic	An02g06300	TTTTTTTC	[T]	TTTTTTTC/	T/
II	1551127	CTCTGGTGTATACTACTTTG	intergenic	An02g06590	ATAC	[A]	A/	ATAC/
II	1551159	TATTGACTGTTATCTTAGGC	intergenic	An02g06590	T	[TAG]	TAG/	T/
II	2133005	CCAAGAGTAAAAAAAAGAAA	3 prime UTR variant	An02g08660	A	[AAAAAG]	AAAAAG/	A/
II	2151264	GTTTAGAACAATGCGTCCGT	frameshift variant	An02g08710	A	[AGT]	AGT/	A/
II	2152432	TCTATACTCTTGTATGACCT	frameshift variant	An02g08710	TTG	[T]	TTG/	T/
II	2175043	AGTGGTGACTGGGGAGGGGG	3 prime UTR variant	An02g08800	T	[TGGGGG, TGGGGGGGGGGGGGGGG]	TGGGGG/	TGGGGGGGGGGGGGGGG/
II	2254259	CCATTAATCACGCCCCCCCT	intergenic	An02g09033	A	[ACCCCC]	ACCCCC/	A/
II	2338617	CGGTGGAAGAGGTTGGTTTA	intergenic	An02g09360	AGG	[A]	AGG/	A/
II	2469951	TGACCATATACGGGATATTA	intergenic	An02g10000	ACGGG	[A]	A/	ACGGG/
II	2470062	ATCCTTCATAAAAAATCTCA	intergenic	An02g10000	A	[AGC]	A/	AGC/
II	2470066	TTCATAAAAAATCTCAAAGA	intergenic	An02g10000	AAT	[A]	AAT/	A/
II	2473207	GGTGATAGTATCTGGATTAG	frameshift variant & splice region variant	An02g10010	AT	[A]	AT/	A/
II	2676367	TTATACTGTGGTCAGTATCC	intergenic	An02e10824	G	[GT]	G/	GT/
II	2684304	TGTTCCCGCCAGCATAGGAG	frameshift variant	An02g10850	C	[CAG]	C/	CAG/
II	2702089	GGTCGACAACTATTTGTCAT	intergenic	An02g10910	CT	[C]	CT/	C/
II	2702093	GACAACTATTTGTCATAATA	intergenic	An02g10910	T	[TTA]	T/	TTA/
II	2736117	TGGGGCCTCATCGTTANNNN	frameshift variant	An02g11120	A	[ATTGTTATCTGTCTATTTTCTTTTGTCTTCACCTGGCCGAACGGCATTCTGTGGGCAGTGGCCAACACGCAGGTCGGAATGGGC]	A/	ATTGTTATCTGTCTATTTTCTTTTGTCTTCACCTGGCCGAACGGCATTCTGTGGGCAGTGGCCAACACGCAGGTCGGAATGGGC/
II	2736122	CCTCATCGTTANNNNNNNNN	intergenic	An02g11100	T	[TCAGTGATTTACTGGCGGGTGCCATGTTCCCTGGG]	T/	TCAGTGATTTACTGGCGGGTGCCATGTTCCCTGGG/
II	2775190	TCCATTTCCTCCCCCCCCCC	intergenic	An02g11320	T	[TCC]	T/	TCC/
II	2854251	CAAAGTGATGACCAGCCTGC	stop gained & conservative inframe insertion	An02g11640	G	[GACCAGCCTGCTGACAAAGCTGCGTGGAAGGGCGTTGCTTTTAGAAGAAATCTGACTGGTACCAAGCCATTTGTCAAGCGTGACAATCAGGATGCTTAGGAGGCTACTGTGAAAGACTTTGATGGACCTTTTGGTCCGGGCCTTCCAAATGTATGTGGTTCTTCAATCCAAAGTGATGACCAGCCTGCTGACAAAGCTGCGTGGAAGGGCGTTGCTTTTAGAAGAGATCTGACTGGTACCAAGCCATTTGTCAAGCATGACAACCAGGATGCCCAGGAGGCTACTGTGAAAGACTTTGATGGACCTTTTGGTCCGGGCCTTCCAAATGTATGTAGTCCTTCAATCCAAAGTGATA, GACCAGCCTGCTGACAAAGCTGCGTGGAAGGGCGTTGCTTT…	GACCAGCCTGCTGACAAAGCTGCGTGGAAGGGCGTTGCTTTTAGAAGAAATCTGACTGGTACCAAGCCATTTGTCAAGCGTGACAATCAGGATGCTTAGGAGGCTACTGTGAAAGACTTTGATGGACCTTTTGGTCCGGGCCTTCCAAATGTATGTGGTTCTTCAATCCAAAGTGATGACCAGCCTGCTGACAAAGCTGCGTGGAAGGGCGTTGCTTTTAGAAGAGATCTGACTGGTACCAAGCCATTTGTCAAGCATGACAACCAGGATGCCCAGGAGGCTACTGTGAAAGACTTTGATGGACCTTTTGGTCCGGGCCTTCCAAATGTATGTAGTCCTTCAATCCAAAGTGATA/	GACCAGCCTGCTGACAAAGCTGCGTGGAAGGGCGTTGCTTTTAGAAGAAATCTGACTGGTACCAAGCCATTTGTCAAGCGTGACAATCAGGATGCTTAGGAGGCTACTGTGAAAGACTTTGATGGACCTTTTGGTCCGGGCCTTCCAAATGTATGTGGTTCTTCAATCCAAAGTGATGACCAGCCTGCTGACAAAGCTGCGTGGAAGGGCGTTGCTTTTAGAAGAGATCTGACTGGTACCAAGCCATTTGTCAAGCATGACAACCAGGATGCCCAGGAGGCTACTGTGAAAGACTTTGATGGACCTTTTGGTCCGGGCCTTCCAAATGTATGTAGTCCTTCAATCCAAAGTGATGACCAGCCTGCTGACAAAGCTGCGTGAAAGGGCGTTGCTTTTAGA…
II	2990105	AACTTGAAGACGGCTTTGTA	intergenic	An02g12340	ACGG	[A]	ACGG/	A/
II	2990123	TAGAAAGCACATGAGTAGAT	intergenic	An02g12340	CATGAG	[C]	CATGAG/	C/
II	2990239	GCCCAGCAGATCGTCACGTC	intergenic	An02g12340	ATCG	[A]	A/	ATCG/
II	3284404	TGGGGAAGGAGNNNNNNNNN	intergenic	An02g13590	A	[AGGATAGAGGGACGAGAGGTGGGAGAGAGCGAGAGAGAGGGGATCGAGTTTAGAAGGCAGATAGTCAAGCGATGGCGTCGATTGCCTTACGCATCCATCCTGGCCTGGGTGGGGACTAGTAGATG]	AGGATAGAGGGACGAGAGGTGGGAGAGAGCGAGAGAGAGGGGATCGAGTTTAGAAGGCAGATAGTCAAGCGATGGCGTCGATTGCCTTACGCATCCATCCTGGCCTGGGTGGGGACTAGTAGATG/	A/
II	3413819	GGGGGGGGGGAAGAGCAGAA	intergenic	An02g14110-An02g14130	GAAGAGCAGAAGGGAGCCTGAGGGAGGGAAGGA	[G, GGGGAGCCTGAGGGAGGGAAGGA]	G/	GGGGAGCCTGAGGGAGGGAAGGA/
II	3413832	AGCAGAAGGGAGCCTGAGGG	intergenic	An02g14110-An02g14130	GAGCCTGAGGGAGGGAAGGA	[G, *]	*/	G/
III	16205	TGGGTAGTCAGCCGGATATT	intergenic	An03g00040	AG	[A]	AG/	A/
III	16249	TAAGTACCGGATATTAATTA	intergenic	An03g00040	G	[GAGGTTTAGTCCTGTA]	G/	GAGGTTTAGTCCTGTA/
III	16277	TAAATTGAAAATGTGAATCA	intergenic	An03g00040	A	[ATC]	A/	ATC/
III	58118	TCCTCTATTGAAGAACCGGG	frameshift variant	An03g00270	GAA	[G]	GAA/	G/
III	58480	TCTCCGCACCGGCATCAGCT	frameshift variant	An03g00270	C	[CG]	CG/	C/
III	59348	GTGAGCAAACGGGGAGGAAA	intergenic	An03g00270	C	[CGCGGGGGGGG, CGCGGGGGGGGG]	CGCGGGGGGGG/	CGCGGGGGGGGG/
III	79651	CTAGCTACTCAACCACACTC	intergenic	An03g00360	C	[CAACT]	CAACT/	C/
III	80027	CACCTTCATATTATGATTTT	intergenic	An03g00360	A	[AT]	AT/	A/
III	111198	CTGTTGTACATGTTCTTTAT	intergenic	An03g00530	A	[ATTTTT, ATTTTTTTTTTTTT]	ATTTTTTTTTTTTT/	ATTTTT/
III	115412	GGTCTTGTATCCTTCTATTA	intergenic	An03g00540	TCC	[T]	TCC/	T/
III	142380	AAGCCGGTTTGGGAGTTTAG	3 prime UTR variant	An03g00680	TGG	[T]	T/	TGG/
III	200859	AAATGGAGCCAAGAAAACCT	intergenic	An03g01010	C	[CAAAAAAAAAAAAAAAAAAAAAAAAAAAAAAAAAAAAAA, CAAAAAAAAAAAAAAAAAAAAAAAAAAAAAAAAAAAAAAAAAAAAAAAAAAAA]	CAAAAAAAAAAAAAAAAAAAAAAAAAAAAAAAAAAAAAA/	CAAAAAAAAAAAAAAAAAAAAAAAAAAAAAAAAAAAAAAAAAAAAAAAAAAAA/
III	207814	AATCCCACGTTGTGCGCTGA	frameshift variant & stop gained	An03g01070	T	[TTTCAAATGCCATTTGATGACGGGCCGAGGCGCCACATCCACATCCCATGGATTGTTGAAGGGCGATTGGAGGAAATTTAGTATCTGGGCTTGAAGCAGTAGACAACGAAACAA]	TTTCAAATGCCATTTGATGACGGGCCGAGGCGCCACATCCACATCCCATGGATTGTTGAAGGGCGATTGGAGGAAATTTAGTATCTGGGCTTGAAGCAGTAGACAACGAAACAA/	T/
III	346637	ATCTACGCCTGAAAACCGCA	intergenic	An03g01760	TGAAAA	[T]	TGAAAA/	T/
III	366427	TCACGCCATGATTCCCATTA	intergenic	An03g01830	GAT	[G]	G/	GAT/
III	366769	CAACCTTGAAGTTACCTTTA	intergenic	An03g01830	AG	[A]	A/	AG/
III	366828	GTAGCGCTTGGAATAACTTC	3 prime UTR variant	An03g01860	G	[GC]	GC/	G/
III	367057	GTTCTTCAGGTTTCCATACT	3 prime UTR variant	An03g01860	G	[GCA]	GCA/	G/
III	430288	GAAGCACAAGTATAAATCAT	intergenic	An03g02200	GTAT	[G]	GTAT/	G/
III	430549	TTTAGTGCTTATATATATGG	frameshift variant	An03g02240	T	[TAC]	TAC/	T/
III	468479	TCTTGTCGCAAGACCCGCGG	intergenic	An03e02440	AAG	[A]	AAG/	A/
III	468485	CGCAAGACCCGCGGCTCCGT	intergenic	An03e02440	CG	[C]	CG/	C/
III	468824	CCAAAATGCATTCACTCTCC	intergenic	An03g02460	AT	[A]	A/	AT/
III	470365	ATTGTCTAACTCTTGAGATG	intergenic	An03g02450	CT	[C]	CT/	C/
III	470393	CATAAGGGTGAATTTGCTCA	intergenic	An03g02450	GA	[G]	GA/	G/
III	597771	TATAATAGCTGAATAAGTAG	intergenic	An03g03000	TGA	[T]	TGA/	T/
III	605770	CTATATAGATGAATAAATAT	intergenic	An03g03030	TGA	[T]	TGA/	T/
III	628049	AAAAACGATAGGGAAGACAA	intergenic	An03g03110	AGGG	[A]	AGGG/	A/
III	677290	AGACCAGAAACTTTGTCTAA	intergenic	An03g03320	ACTTT	[A]	A/	ACTTT/
III	678693	AATCAAACGGGTGTTCTATA	frameshift variant	An03g03310	G	[GCT]	G/	GCT/
III	678697	AAACGGGTGTTCTATATCTG	frameshift variant	An03g03310	TTC	[T]	TTC/	T/
III	681633	ATGCGGGATTGGGTCACTTG	intergenic	An03g03310	TG	[T]	T/	TG/
III	686756	TCCTTAAACACATATCGCGG	frameshift variant	An03g03340	AC	[A]	A/	AC/
III	805131	TATGGCTGAGGAAAAAAAAA	intergenic	An03g03770	G	[GAAAAAAAAAAAAAAAAAAAAAAAAAAAAAAAAAAAAAA, GAAAAAAAAAAAAAAAAAAAAAAAAAAAAAAAAAAAAAAA]	GAAAAAAAAAAAAAAAAAAAAAAAAAAAAAAAAAAAAAA/	GAAAAAAAAAAAAAAAAAAAAAAAAAAAAAAAAAAAAAAA/
III	1199086	TCTCTTCCATCCACCAGGCA	intergenic	An03g05360	TCC	[T]	TCC/	T/
III	1202569	GGAGACGACGTNNNNNNNNN	intergenic	An03g05380	G	[GTCGCATCCGCCGTAGCGGCCGCGTATCCAGCCGTAAAGCCTTCTCTGCGGGCCCCGGATTACAGAAGCAGCCAGTGCGCAAGGAGATCGAGGCGGTTGCCGATTCCTGCGCCACGAGTCGCTCA]	GTCGCATCCGCCGTAGCGGCCGCGTATCCAGCCGTAAAGCCTTCTCTGCGGGCCCCGGATTACAGAAGCAGCCAGTGCGCAAGGAGATCGAGGCGGTTGCCGATTCCTGCGCCACGAGTCGCTCA/	G/
III	1558922	TTTTTTTTTTTTTTTTCTTT	intergenic	An03g06820	TTTTTTTC	[T]	TTTTTTTC/	T/
IV	14785	AATTTCACTCTTTTTTTTTT	5 prime UTR variant	An04g00080	C	[CTTTT, CTTTTT]	CTTTTT/	CTTTT/
IV	58927	AAAAAAAAAAAAAATTTCCC	intergenic	An04g00300	AAAAAT	[A]	AAAAAT/	A/
IV	221119	GGAACCTCTCAGAGCGAGTT	frameshift variant	An04g00900	CA	[C]	CA/	C/
IV	222356	CTGATGCTAATGTTCGTTGA	frameshift variant	An04g00900	ATGTT	[A]	ATGTT/	A/
IV	222366	TGTTCGTTGAAACCACCGAG	frameshift variant	An04g00900	A	[ATT]	A/	ATT/
IV	222384	AGGCTGACAAAGGGAAGTTG	frameshift variant	An04g00900	AAG	[A]	AAG/	A/
IV	222389	GACAAAGGGAAGTTGGCGAA	frameshift variant	An04g00900	AAGTTGGC	[A]	AAGTTGGC/	A/
IV	222491	GAAAGCGCAGCTCACAATGT	frameshift variant	An04g00900	GCT	[G]	GCT/	G/
IV	718073	TACCTTCCTGTTTTTTTTTT	intergenic	An04g02820	G	[GT]	G/	GT/
IV	763841	CAACAACGTGAAATCGAAAT	intergenic	An04g03030	G	[GGAATCGGTTGTATTTATCCAGGACGCGGATGGGAGATTCTTGATCCGCCACACCAAAGATGACAAGTACATCGAATGCCATCAGATGGACGCGGAGTGCCAGCTCTCATATTATGGGACTGCATTCCAAAGACAAGTGCTATCGGAGGAGGATGGCAAGACATATTAAACCATTGAACAAGCCGTTTCTGAGAACAGGGCTGAGGCAATAGTACGATA]	GGAATCGGTTGTATTTATCCAGGACGCGGATGGGAGATTCTTGATCCGCCACACCAAAGATGACAAGTACATCGAATGCCATCAGATGGACGCGGAGTGCCAGCTCTCATATTATGGGACTGCATTCCAAAGACAAGTGCTATCGGAGGAGGATGGCAAGACATATTAAACCATTGAACAAGCCGTTTCTGAGAACAGGGCTGAGGCAATAGTACGATA/	G/
IV	763917	CCTATACGGAGAAGACTGTA	intergenic	An04g03030	A	[AGGG]	AGGG/	A/
IV	813963	GTCCGCCGCGGATNNNNNNN	intergenic	An04g03220	G	[GGATCTCATCTCCTCCACTGTAGCCGGACGATATGTCGGCTGCTTCATTTCCTCGCCCAAGCTCAAACAAAGCGACAACTTCTCCGCAATCTGGTAAATCTCATGAAAAGGAGACTCGGGC]	G/	GGATCTCATCTCCTCCACTGTAGCCGGACGATATGTCGGCTGCTTCATTTCCTCGCCCAAGCTCAAACAAAGCGACAACTTCTCCGCAATCTGGTAAATCTCATGAAAAGGAGACTCGGGC/
IV	1137032	CACTCAATAATACATCATCC	5 prime UTR variant	An04g04570	ATAC	[A]	ATAC/	A/
IV	1137120	TGCTGAACACGTGCTTGTCT	frameshift variant	An04g04570	CGT	[C]	CGT/	C/
IV	1137131	TGCTTGTCTGACACGGGGGA	frameshift variant	An04g04570	GAC	[G]	GAC/	G/
IV	1420143	ATAATTATCCCTTTTTTTTT	intergenic	An04g05780	C	[CTTTTTTTTTTTTTTTTTTTTTTTTTTTT]	C/	CTTTTTTTTTTTTTTTTTTTTTTTTTTTT/
IV	1522456	ACCTGAAGACTTTTTTTTTT	intergenic	An04g06120	CT	[C]	C/	CT/
IV	1891766	CGACATTTACTGTATACTAT	intergenic	An04g07620	C	[CCG]	C/	CCG/
IV	1891771	TTTACTGTATACTATTTTGG	intergenic	An04g07620	TAC	[T]	TAC/	T/
IV	1891864	ATAATAAGATTTAAATTTCT	intergenic	An04g07620	TTTAA	[T]	TTTAA/	T/
IV	1892248	TATCAAATATTCATAATTAT	intergenic	An04g07620	TTCATAA	[T]	T/	TTCATAA/
IV	1892257	TTCATAATTATAAATAAGCC	intergenic	An04g07620	A	[ATGGC]	ATGGC/	A/
IV	1902609	AGTTTTTATATTTTTTTTAT	intergenic	An04g07680	A	[ATCTC]	ATCTC/	A/
IV	1902761	CAGGGCTTGGAGAATATATA	intergenic	An04g07680	G	[GAATCTAA, A]	GAATCTAA/	A/
IV	1920541	TAACGAGGGACTCTGATTGT	intergenic	An04g07760	AC	[A]	A/	AC/
IV	1920728	TGCGGCCCCATTTTCTCTAT	intergenic	An04g07760	ATTT	[A]	ATTT/	A/
IV	1920735	CCATTTTCTCTATGTTAGTG	intergenic	An04g07760	CTATG	[C]	CTATG/	C/
IV	1933613	AAAAAGCCCGGTTGTGCCAC	intergenic	An04g07840	G	[GCATC]	G/	GCATC/
IV	1933646	TCCAAAAATTAAGAAATAGT	intergenic	An04g07840	TAAGAAATA	[T]	TAAGAAATA/	T/
IV	1933656	AAGAAATAGTATGATTAACG	intergenic	An04g07840	T	[TGGG]	T/	TGGG/
IV	1933661	ATAGTATGATTAACGTGGTT	intergenic	An04g07840	TTAAC	[T]	TTAAC/	T/
IV	1934145	AAGATATTATAATAATCCAG	intergenic	An04g07840	TAA	[T]	T/	TAA/
IV	1934236	CGCATAAATTCAATACCGTT	intergenic	An04g07840	TCAATA	[T]	T/	TCAATA/
IV	1937919	TTTTTTTTTTAGGACTACTC	intergenic	An04g07860	T	[TTAA]	TTAA/	T/
IV	1952608	ATGACTTATAGGGAGAAGTA	intergenic	An04g07910	A	[ATT]	ATT/	A/
IV	1968619	TCCCAGAAGAAGCAGATACT	intergenic	An04g07990	AAGCAG	[A]	AAGCAG/	A/
IV	1972289	ATATATTCAGCTTTTCTCTC	frameshift variant	An04g08000	G	[GA]	GA/	G/
IV	1973202	AGGCAATCTCTCTTCATATC	frameshift variant	An04g08000	C	[CT]	C/	CT/
IV	1973206	AATCTCTCTTCATATCTGCA	frameshift variant	An04g08000	TC	[T]	TC/	T/
IV	1974356	TTTGTAGATAGAGATTATTA	intergenic	An04g08000	A	[AGGCG]	A/	AGGCG/
IV	1974408	ATAGCAGTTAGATATTTTTT	intergenic	An04g08000	AG	[A]	AG/	A/
IV	1974410	AGCAGTTAGATATTTTTTTA	intergenic	An04g08000	AT	[A]	AT/	A/
IV	1974478	TAATATTACATTCTAACAGA	intergenic	An04g08000	AT	[A]	AT/	A/
IV	1996359	ACTTTGGTGCTTTTTTTTTT	intergenic	An04g08090	C	[CTTTTTTTTTTTTTTTTTTTTT]	C/	CTTTTTTTTTTTTTTTTTTTTT/
IV	2133805	AGTATACAGAAATTTTTACT	frameshift variant	An04g08780	A	[AAC]	AAC/	A/
IV	2297224	TAAAAAAAAGAAAAGAAAAA	intergenic	An04g09420	G	[GGAAAA, GGAAAAA]	GGAAAA/	GGAAAAA/
IV	2474719	AATTCTTGAGAAATCAGTCT	intergenic	An04g10180	GA	[G]	GA/	G/
IV	2480353	AATTGCTGCGCCCCCCACCC	intergenic	An04g10190	G	[GCCCCCCCCCC, GCCCCCCCCCCCCC]	GCCCCCCCCCC/	GCCCCCCCCCCCCC/
V	639	ACAAGCAGTTGCAATGCGTT	intergenic	An05g00010	T	[TTGTCAAACCCTAGGATCGCTTCCCTGTCCCAGTTAGCTTAGCCCCGTTGGTATTCGTACCGTCGAACTGTGTCGAGGTA]	T/	TTGTCAAACCCTAGGATCGCTTCCCTGTCCCAGTTAGCTTAGCCCCGTTGGTATTCGTACCGTCGAACTGTGTCGAGGTA/
V	35874	AGAGGGGGGGGAGAGAGAGA	intergenic	An05g00150	G	[GGGGGGGGGGGGGGGGGGAGA, GGGGGGGGGGGGGGGGGGGGGAGA]	GGGGGGGGGGGGGGGGGGAGA/	GGGGGGGGGGGGGGGGGGGGGAGA/
V	47457	TTTTTTTTTTCCCTTTTCCC	intergenic	An05g00210	TCCC	[T]	T/	TCCC/
V	47498	TTCTTTTTTTCTACTTTTGT	intergenic	An05g00210	TCTAC	[T]	T/	TCTAC/
V	173515	CAAATTTTGCTTTTTTTTTT	3 prime UTR variant	An05g00605	C	[CTTT, CTTTT]	CTTT/	CTTTT/
V	293058	CGGATCCACAGAGAAAAGAA	intergenic	An05g01080	AGAGAAAAG	[A]	A/	AGAGAAAAG/
V	318390	TGCTATACCTGGTTTCCTTC	frameshift variant & splice region variant	An05g01230	TG	[T]	TG/	T/
V	318394	ATACCTGGTTTCCTTCTGCG	disruptive inframe deletion	An05g01230	TTCC	[T]	TTCC/	T/
V	373921	TATATATTCAATTTCTCCTA	intergenic	An05g01610	AAT	[A]	A/	AAT/
V	386925	CAGCACAGCAGTGTTCCCCC	5 prime UTR variant	An05g01640	AGTGTT	[A]	AGTGTT/	A/
V	386971	TCTCTTTTTTTAATCAGGGC	5 prime UTR variant	An05g01640	TTA	[T]	TTA/	T/
V	447182	TTGTTTCTAGAGAGACGTCA	frameshift variant	An05g01900	GA	[G]	G/	GA/
V	447327	ATTGCCTGCCCAGTTTTCGG	intergenic	An05g01890	C	[CCAA]	CCAA/	C/
V	494804	GTCAGCCTGAGTAAGATATG	intergenic	An05g02160	AGT	[A]	AGT/	A/
V	524625	AAAGCCTATGGACCTGAGCG	intergenic	An05g02330	G	[GAA]	GAA/	G/
V	531426	CGCTGCTGGGCTCGGGATAT	frameshift variant	An05g02380	GC	[G]	G/	GC/
V	542533	GGATACGAAGTAATAATAAT	intergenic	An05g02410	GTAA	[G]	GTAA/	G/
V	546964	CAAAGAAATAATACATTGAT	intergenic	An05g02420	AAT	[A]	A/	AAT/
V	547188	TATGGAATGGAAACGCATAA	intergenic	An05g02420	GAAA	[G]	G/	GAAA/
VI	52027	GTTCAATACCTGTGGTCTCT	intergenic	An06g00210	C	[CT]	CT/	C/
VI	59548	GCACAGAAGACTTATGTTCC	intergenic	An06g00250	A	[AT]	AT/	A/
VI	59551	CAGAAGACTTATGTTCCAGA	intergenic	An06g00250	TA	[T]	T/	TA/
VI	90916	ATAGTCCCTGCCTCAACGTC	splice region variant & intron variant	An06g00390	G	[GATCTGGCTCAATGGCGCTCAATGGTGTGTATGTCTTATTGGTCCGCTGGTCGTGGAGGACAGCATGGCGCTGGGAAAAGGTACCTCGTTCGACATCCTGTCCGGCTACTCGGACGCCTTTGC]	G/	GATCTGGCTCAATGGCGCTCAATGGTGTGTATGTCTTATTGGTCCGCTGGTCGTGGAGGACAGCATGGCGCTGGGAAAAGGTACCTCGTTCGACATCCTGTCCGGCTACTCGGACGCCTTTGC/
VI	157041	AATATCACCATCCCGTGCAA	stop gained & disruptive inframe insertion	An06g00670	A	[AGTAGTAGTAGTAATAGTAGTAGAATTCATTAACCTGATATAGCCAGTCTTATTAATAGTCTTACTATACAGGTATTCCCTAGACTTCTAGAAAAACTAT]	A/	AGTAGTAGTAGTAATAGTAGTAGAATTCATTAACCTGATATAGCCAGTCTTATTAATAGTCTTACTATACAGGTATTCCCTAGACTTCTAGAAAAACTAT/
VI	191134	CCCATGGGGGTACTTCACTA	frameshift variant	An06g00780	GTA	[G]	G/	GTA/
VI	191163	CCGTACGTATAGATCCGCCG	frameshift variant	An06g00780	TA	[T]	T/	TA/
VI	208774	GCGATTGTAACAGAATCAAT	frameshift variant	An06g00870	A	[AC]	AC/	A/
VI	208892	CTGTCCGCTTTCGAGGCCTG	intergenic	An06g00840	T	[TG]	TG/	T/
VI	257607	TATATCTACTAANNNNNNNN	intergenic	An06g01080	T	[TAATTTTATCTTCTTTGCAATCTTTGCTATATATATAATAATTACTATTATCAAGTATAATAAGACTCTCTTTTTAAGCCAGATTTTTATATCTTTCTTATTTATATCTTTTATAACA]	T/	TAATTTTATCTTCTTTGCAATCTTTGCTATATATATAATAATTACTATTATCAAGTATAATAAGACTCTCTTTTTAAGCCAGATTTTTATATCTTTCTTATTTATATCTTTTATAACA/
VI	504167	GATTTTAGCAATCATTTAAA	intergenic	An06g02000	AATC	[A]	AATC/	A/
VI	563094	ACTCAATAGAAGATTGAGTA	intergenic	An06g02230	A	[AT]	AT/	A/
VI	563172	GAGAGTGTGTCTAGTCGTTT	intergenic	An06g02230	TC	[T]	T/	TC/
VI	563174	GAGTGTGTCTAGTCGTTTAT	intergenic	An06g02230	TAGTCGTTTATCAGTC	[T]	T/	TAGTCGTTTATCAGTC/
VI	563494	CAGATACAAAATATACTAGG	intergenic	An06g02260	AAT	[A]	A/	AAT/
VI	564237	CAAGATTATTGAATATATTT	intergenic	An06g02250	TGA	[T]	TGA/	T/
VI	564324	AAGATAATATATATTATCTA	intergenic	An06g02250	T	[TGA]	T/	TGA/
VI	564327	ATAATATATATTATCTATTC	intergenic	An06g02250	ATT	[A]	ATT/	A/
VI	564360	AATGTGCTTCAAAGAAATAG	intergenic	An06g02250	CA	[C]	CA/	C/
VI	565545	CTTGACCGTTCGCGTACCAG	intergenic	An06g02250	TCGCG	[T]	TCGCG/	T/
VI	566003	ATGGACTTCAATGGCTGAAG	intergenic	An06g02250	AAT	[A]	A/	AAT/
VI	666050	GTGATAGAGTCCGCATACAC	frameshift variant	An06g02630	TCCGC	[T]	TCCGC/	T/
VI	667354	CACCACCGGACGGGACGTAA	frameshift variant	An06g02640	ACGGGACG	[A]	A/	ACGGGACG/
VI	671277	AATTGGAATTGAGAGGGGAG	intergenic	An06g02650	T	[TAAAA]	TAAAA/	T/
VI	671281	GGAATTGAGAGGGGAGATAG	intergenic	An06g02650	AGGGG	[A]	A/	AGGGG/
VII	12147	ACCTGCCTTCTTTTTGTTTT	3 prime UTR variant	An07g00060	C	[CTTTTTTTTTTTTTTTTTTTTTTTTTTTTTTTTTTTTTT]	C/	CTTTTTTTTTTTTTTTTTTTTTTTTTTTTTTTTTTTTTT/
VII	29088	GGTCACTAGATTTCTTTTGG	conservative inframe insertion	An07g00160	A	[AGTT]	AGTT/	A/
VII	29481	AAACGAAACTATTACTTTGG	frameshift variant	An07g00160	TA	[T]	TA/	T/
VII	154094	AGGGTTGGGTTGGGGAGGAA	intergenic	An07g00860	TTGGG	[T]	TTGGG/	T/
VII	275530	CGATGAGAAAAAAAAAAAAA	intergenic	An07g01450	A	[AATT]	A/	AATT/
VII	345274	AATATGAAGAAGAGGACTTG	intergenic	An07g01890	AAG	[A]	AAG/	A/
VII	346057	TAGCATAAGGTTAATCTTGC	intergenic	An07g01860	GT	[G]	G/	GT/
VII	373440	AGCAACAAACTTCATATCCA	intergenic	An07g01960	C	[CAAAGACCCCAAGGCGTAAGAGGAGCCGTGGTTGGTAGCAGTAGCAACCAAGTATAAAGTAGATGATGATAACGATACGCCACATCAAAAGGTCTTCCTATTATTCAGAGA]	CAAAGACCCCAAGGCGTAAGAGGAGCCGTGGTTGGTAGCAGTAGCAACCAAGTATAAAGTAGATGATGATAACGATACGCCACATCAAAAGGTCTTCCTATTATTCAGAGA/	C/
VII	514191	CATCTCTTGCTTTTGTTTTT	intergenic	An07g02530	C	[CTTTTTTTTTTTT, CTTTTTTTT]	CTTTTTTTTTTTT/	CTTTTTTTT/
VII	1064646	GCTGGATATAAAAACGCCGC	stop gained & conservative inframe insertion	An07g04910	A	[ATCCCAGTATCGAGAAATCATCCGACGGATGCATATTTTCTCAGTCCGAACGGGTCGAACCTTCGAG]	ATCCCAGTATCGAGAAATCATCCGACGGATGCATATTTTCTCAGTCCGAACGGGTCGAACCTTCGAG/	A/
VII	1101368	CAAACCGGTTTTGGACACAT	intergenic	An07g05020	TTTGG	[T]	T/	TTTGG/
VII	1101373	CGGTTTTGGACACATGCAAG	intergenic	An07g05020	AC	[A]	A/	AC/
VII	1215940	AGAACCGGGGGCAGAGCCAG	disruptive inframe insertion	An07g05660	G	[GGCAGAGCCGGAACCAGAGCCGGGGTAAGAACCCGATCCTGGAGCAGAGCCGGAGCCGGAGCCGGGGTAAGACCCAGAGCCAGGA]	G/	GGCAGAGCCGGAACCAGAGCCGGGGTAAGAACCCGATCCTGGAGCAGAGCCGGAGCCGGAGCCGGGGTAAGACCCAGAGCCAGGA/
VII	1337558	TTCATAGCTGTTGTATATAT	intergenic	An07g06200	GTTGTATATATAGTAGTAACCATA	[G]	GTTGTATATATAGTAGTAACCATA/	G/
VII	1337613	GCGTGCACTGTACAAGTAAT	intergenic	An07g06200	GTAC	[G]	GTAC/	G/
VII	1337618	CACTGTACAAGTAATTGACG	intergenic	An07g06200	AG	[A]	AG/	A/
VII	1337690	TGCCAGGCTCATTTGAATAT	intergenic	An07g06200	C	[CCA]	C/	CCA/
VII	1741153	CCCCAACCCCAACCCCAACC	intergenic	An07g07940	CAA	[C]	CAA/	C/
VII	1741159	CCCCAACCCCAACCCCAACC	intergenic	An07g07940	CAA	[C]	CAA/	C/
VII	1985514	TCCAGCCCTGCATTTTGTTA	intergenic	An07g08910	GC	[G]	G/	GC/
VII	2121922	GATGGGATAGATGCTTTTGG	frameshift variant	An07g09460	G	[GGT]	G/	GGT/
VII	2121924	TGGGATAGATGCTTTTGGTG	frameshift variant	An07g09460	TGC	[T]	TGC/	T/
VII	2175902	GCCTGTCACTATCNNNNNNN	intergenic	An07g09690	T	[TCTCCTTC]	T/	TCTCCTTC/
VIII	37474	CCTCCTTTCCTTTTTTTTTT	intergenic	An08g00230	C	[CTTTT]	C/	CTTTT/
VIII	302256	GACCAATACAGNNNNNNNNN	intergenic	An08g01380	A	[AAGCAGAAGAAACGGGGGCGTGTGGTTGGTGGGCAGGAGGGGGTGTAGTAAGTTAGTAGTAGTAGTAGTAGAGACGGTCAGAAAAGCATCCATCAAGGAGGGTAGCACCGTCC]	AAGCAGAAGAAACGGGGGCGTGTGGTTGGTGGGCAGGAGGGGGTGTAGTAAGTTAGTAGTAGTAGTAGTAGAGACGGTCAGAAAAGCATCCATCAAGGAGGGTAGCACCGTCC/	A/
VIII	512508	CGAACGCATAATGTAATGTT	splice region variant	An08g02290	AATGTAATGTTGAGACATTCACTGCAGCCAGGCAGCTGTCAGCTGATCCTTCGCCTTTCTTCCTGCGTGGTCTCTGACCACCACCTCTTCCAACCACCAACCATCTTCTTGAGATCTAGATAGATCAAATCCATATGTTCTTGACCCTTCGTCTTGAC	[A]	A/	AATGTAATGTTGAGACATTCACTGCAGCCAGGCAGCTGTCAGCTGATCCTTCGCCTTTCTTCCTGCGTGGTCTCTGACCACCACCTCTTCCAACCACCAACCATCTTCTTGAGATCTAGATAGATCAAATCCATATGTTCTTGACCCTTCGTCTTGAC/
VIII	512517	AATGTAATGTTGAGACATTC	3 prime UTR variant	An08g02290	T	[TAATTACATGGCATTGTGCAGCATAGTTAAGGTGGCTCATTGCGTCGCGGGGAGCCTTAAGTGCATTTGTTGG, *]	*/	TAATTACATGGCATTGTGCAGCATAGTTAAGGTGGCTCATTGCGTCGCGGGGAGCCTTAAGTGCATTTGTTGG/
VIII	1035001	CGCATGACATCCCCCCCCCC	intergenic	An08g04280	T	[TC]	TC/	T/
VIII	1258111	TTAAGCTGTACCAAGCGGTG	conservative inframe insertion	An08g05210	A	[AGTACGTGGTGGATGT]	A/	AGTACGTGGTGGATGT/
VIII	1316317	CAAGACGGGGGAGGAGTGTG	frameshift variant	An08g05470	GGAGGAGTGTGGAGGAAGTTCGCAGGAAGCCT	[G]	GGAGGAGTGTGGAGGAAGTTCGCAGGAAGCCT/	G/
VIII	1443000	GCACAGAACATTAAAAAAAA	intergenic	An08g06100	ATT	[A]	A/	ATT/
VIII	1454854	AGTGAGTATTGGGGGGGGGG	intergenic	An08g06125	TGGGGGGGG	[T]	TGGGGGGGG/	T/
VIII	1657898	CGTTGGACACACAAAAGCCA	intergenic	An08g06910	C	[CAAAAAAAAAAAAAAAAAAAAAAAAAAAAAAAAAAAAAAA]	C/	CAAAAAAAAAAAAAAAAAAAAAAAAAAAAAAAAAAAAAAA/
VIII	1926629	AATCCATTGCTTCCGATCCT	intergenic	An08g08090	CTT	[C]	CTT/	C/
VIII	2137999	ACAAAGGGGATATAAAGAGG	intergenic	An08g08970	A	[ATG]	ATG/	A/
VIII	2193619	CTCAGATGCGCATTTGTCTC	frameshift variant	An08g09240	G	[GCT]	GCT/	G/
VIII	2204296	CATCAGGCTGGTGTTTCGGG	stop gained & conservative inframe insertion	An08g09280	G	[GCCTACATCCTGGTCAATACGCCGTTATTGCCAGAGCGCTATTCGAGTCAGTTTTCCTTCTCCATTGTGACTTGCCTCAATGGAAATACGGAGGCAGGCATTGACTTCTGCA]	GCCTACATCCTGGTCAATACGCCGTTATTGCCAGAGCGCTATTCGAGTCAGTTTTCCTTCTCCATTGTGACTTGCCTCAATGGAAATACGGAGGCAGGCATTGACTTCTGCA/	G/
VIII	2260734	AAAATATATATATATATGAA	intergenic	An08g09530	ATATATATG	[A]	A/	ATATATATG/
VIII	2260736	AATATATATATATATGAAAG	intergenic	An08g09530	ATATATG	[A, *]	*/	A/
VIII	2514536	GTCTTTATCTTTTTTCTTTT	intergenic	An08g10500	T	[TCTCTC]	TCTCTC/	T/
VIII	2613616	GAATCACCTGCACGGCATCT	frameshift variant	An08g10940	GC	[G]	G/	GC/
VIII	2626329	TTAGGGCTTCTTTTCAGAGA	intergenic	An08g10980	CT	[C]	CT/	C/
VIII	2661388	AATATTAGTGAGATTTGCAT	intergenic	An08g11230	GA	[G]	G/	GA/
VIII	2661419	GAATCTACAAAAGTGAATTG	intergenic	An08g11230	A	[AACAC]	AACAC/	A/
VIII	2661425	ACAAAAGTGAATTGTGCTTA	intergenic	An08g11230	AATTG	[A]	A/	AATTG/
VIII	2661435	ATTGTGCTTATCTTCAGCCT	intergenic	An08g11230	A	[AT]	AT/	A/
VIII	2661439	TGCTTATCTTCAGCCTTCCA	intergenic	An08g11230	TC	[T]	T/	TC/
VIII	2661453	CTTCCAGTTAACGTATTCCA	intergenic	An08g11230	A	[ATT]	ATT/	A/
VIII	2662017	TCCGGAGATGGTATTGCTTG	conservative inframe insertion	An08g11210	G	[GTTATTGTTATCAAGCGAATATTTA]	G/	GTTATTGTTATCAAGCGAATATTTA/
VIII	2663427	CGGTATGCATGACCTGCTAA	intergenic	An08g11210	TG	[T]	T/	TG/
VIII	2729535	CATTGACACCCTTTCCCTAA	3 prime UTR variant	An08g11520	CCT	[C]	C/	CCT/
VIII	2731590	CATAGCGGGTTCTCTCTATT	intergenic	An08g11550	TTC	[T]	T/	TTC/
VIII	2731687	AGGAAGGGTATTCCGAGCCT	disruptive inframe insertion	An08g11540	A	[AGCC]	AGCC/	A/
VIII	2733543	CAAATACCAAGTTGACAGAA	intergenic	An08g11540	A	[ATATGAC]	ATATGAC/	A/
VIII	2733776	CCTACTTATTGGTTCATATC	intergenic	An08g11540	TG	[T]	TG/	T/
VIII	2733784	TTGGTTCATATCCGCTGGTT	intergenic	An08g11540	AT	[A]	AT/	A/
VIII	2750578	ACTTCTATGTCAGTGTAAGA	intergenic	An08g11610	T	[TCA]	TCA/	T/
VIII	2759369	TTAGCCAGACATAGAGAATC	intergenic	An08g11640-An08g11650	CAT	[C]	C/	CAT/
VIII	2768535	GGATGTGTTGTATGGGCATG	intergenic	An08g11650	G	[GT]	GT/	G/
VIII	2768660	ACTTGTGACAAATGCATCTG	intergenic	An08g11650	AAAT	[A]	A/	AAAT/
VIII	2769261	TCAAAGTTAGAGGTAAGGCG	intergenic	An08g11650	G	[GA]	GA/	G/
VIII	2781013	CGTTTGCTCCTCTTTTATTC	frameshift variant & splice acceptor variant & splice region variant & intron variant	An08g11710	CTCTTTTATTCTTTTTTTTATTTTTATTTTATTTATTTATTTAT	[C, CT]	C/	CT/
VIII	2790392	TTAGCCTCCCACCAGGATAT	frameshift variant	An08g11750	C	[CT]	C/	CT/
VIII	2790510	TGAAAGACGGATTCGGCTCC	frameshift variant	An08g11750	GA	[G]	GA/	G/
VIII	2794643	TGATTGGACAGGGGGTTAGC	intergenic	An08g11750	AGGGGGTT	[A]	A/	AGGGGGTT/
VIII	2794670	GCCAACTTAAATCCTGGATA	intergenic	An08g11750	AAT	[A]	A/	AAT/
VIII	2811596	ATATAATTTCTATTGTATAC	intergenic	An08g11810	C	[CAGG]	CAGG/	C/
VIII	2818271	TAATCCAAGCAGTGTTGCAA	intergenic	An08g11820	CAGT	[C]	CAGT/	C/
VIII	2818533	ACCAGTCGTTGGGTTACGGA	intergenic	An08g11820	T	[TG]	T/	TG/
VIII	2818555	CAAAATCACTCCCACGTACA	intergenic	An08g11820	TCC	[T]	TCC/	T/
VIII	2818651	ACCGGAGCAGGTCTGCGCCT	intergenic	An08g11820	GGTCTGCGC	[G]	G/	GGTCTGCGC/
VIII	2821633	AGCCGTGTTGCTGATGCTAT	frameshift variant	An08g11870	GCTGA	[G]	G/	GCTGA/
VIII	2821638	TGTTGCTGATGCTATCATTG	frameshift variant	An08g11870	T	[TCGGC]	TCGGC/	T/
VIII	2821784	CATGCGAGACCACAGTCAAT	intergenic	An08g11840	CCA	[C]	C/	CCA/
VIII	2823583	CTGCATGGAAGGTGGTGGGT	intergenic	An08g11870	AGGTGGTG	[A]	AGGTGGTG/	A/
VIII	2823618	TTGTGGATTCCCGAGGGTAT	intergenic	An08g11870	C	[CT]	C/	CT/
VIII	2823625	TTCCCGAGGGTATATAGCGT	intergenic	An08g11870	GTA	[G]	GTA/	G/
VIII	2824050	TTATGGTGGAGTAGATCGAG	intergenic	An08g11870	A	[AGTGCT]	AGTGCT/	A/
VIII	2824093	ACTCTTAGTACAGTAGCAAT	intergenic	An08g11870	ACAG	[A]	A/	ACAG/
VIII	2824121	AATCTCCAAACTCTCCAAGC	intergenic	An08g11870	ACTCTCCAAG	[A]	A/	ACTCTCCAAG/
VIII	2824207	CCACTGCTCTGGCGGTTCAA	intergenic	An08g11870	TG	[T]	T/	TG/
VIII	2826380	CAAAATACCCAAAAAAACCC	intergenic	An08g11870	CA	[C]	CA/	C/
VIII	2827782	CTTCAACTATAGATGCTTGC	intergenic	An08g11870	TA	[T]	TA/	T/
VIII	2827871	TAGAGTAGAAGATCTCTGCT	frameshift variant	An08g11910	A	[AT]	A/	AT/
VIII	2827882	ATCTCTGCTCCGAGTTTGCG	frameshift variant	An08g11910	CCG	[C, TCG]	C/	TCG/
VIII	2828982	ATGGTAGCTTTGGAGAAGAC	frameshift variant	An08g11910	TTG	[T]	TTG/	T/
VIII	2828993	GGAGAAGACGCGCTGCTTAG	frameshift variant	An08g11910	G	[GC]	G/	GC/
VIII	2836582	AATGAAATACAATTTGACTG	frameshift variant	An08g11950	C	[CA]	CA/	C/
VIII	2838385	AACCAAGTCACTCAAGATGC	intergenic	An08g11950	AC	[A]	A/	AC/
VIII	2838390	AGTCACTCAAGATGCTTCCC	intergenic	An08g11950	A	[AAG]	AAG/	A/
VIII	2838778	TACCAAGTGCTTCAAGTGAT	intergenic	An08g11950	C	[CA]	C/	CA/
VIII	2838781	CAAGTGCTTCAAGTGATTTT	intergenic	An08g11950	CA	[C]	CA/	C/
VIII	2838790	CAAGTGATTTTACGGTACAA	intergenic	An08g11950	T	[TC]	T/	TC/
VIII	2838798	TTTACGGTACAAAGTGCTAC	intergenic	An08g11950	CA	[C]	CA/	C/
VIII	2838878	ACTGGCAATCGAGCAGGCAC	intergenic	An08g11950	CG	[C]	C/	CG/
VIII	2838933	TAGTCTGCGAATGGGGCCAG	intergenic	An08g11950	AAT	[A]	A/	AAT/
VIII	2838937	CTGCGAATGGGGCCAGAATA	intergenic	An08g11950	G	[GA]	GA/	G/
VIII	2839031	AGCAGCTTCACTCTTGCCTC	intergenic	An08g11950	ACTCT	[A]	ACTCT/	A/
VIII	2839037	TTCACTCTTGCCTCGCCTTC	intergenic	An08g11950	GCCTCGCC	[G]	GCCTCGCC/	G/
VIII	2853886	TCATATTCGTTGTACTTTTC	intergenic	An08g12010	T	[TATATAG]	TATATAG/	T/
VIII	2853905	CTGTCTTCAGATTCCAATTG	intergenic	An08g12010	GA	[AA, G]	AA/	G/
VIII	2868229	CCACGTGACTCTGTCCGCCT	disruptive inframe deletion	An08g12110	TCTG	[T]	TCTG/	T/
VIII	2869592	CTGGTCTGACTATCTCATTC	frameshift variant	An08g12110	C	[CCACTT]	CCACTT/	C/
VIII	2869596	TCTGACTATCTCATTCCAGA	frameshift variant	An08g12110	CTCATT	[C]	C/	CTCATT/
VIII	2894289	GGAGTTCAGGAACGAAAATG	frameshift variant	An08g12170	GAA	[G]	GAA/	G/
VIII	2894310	AGTCACCGTCTGAAAAAAAT	frameshift variant	An08g12170	C	[CT]	C/	CT/
VIII	2911248	AATGGTGGGGGCACTGCCCG	intergenic	An08g12220	GGCACTGCCCGGA	[G, AGCACTGCCCGGA]	AGCACTGCCCGGA/	G/
VIII	2911455	GTGTTGCGACGCACTGAATG	frameshift variant	An08g12230	C	[CTA]	CTA/	C/
VIII	2911774	AGTAGAGATAAATACTGATA	intergenic	An08g12220	A	[ACT]	ACT/	A/
VIII	2911776	TAGAGATAAATACTGATACG	intergenic	An08g12220	ATAC	[A]	A/	ATAC/
VIII	2920378	CACGACCGTTCGGGACCGGG	frameshift variant	An08g12250	T	[TCA]	TCA/	T/
VIII	2920596	CAGTCTCGCAACCACCGGAC	intergenic	An08g12240	A	[AAT]	A/	AAT/
VIII	2920598	GTCTCGCAACCACCGGACCA	intergenic	An08g12240	CCA	[C]	CCA/	C/
IX	402	ATAGCCTTTCGGGATTTTTT	intergenic	An09g00010	C	[CA]	CA/	C/
IX	408	TTTCGGGATTTTTTAGACTA	intergenic	An09g00010	T	[TC]	T/	TC/
IX	2789	TTAAGTTTATAAAAAAATAA	intergenic	An09g00030	T	[TG, TA]	TA/	TG/
IX	2852	ACCAGCCTGGGAAGGTGGTT	intergenic	An09g00030	G	[GAA]	G/	GAA/
IX	3150	TTATATTATAATTTAAAAGA	intergenic	An09g00030	A	[G, AG]	G/	AG/
IX	55525	CCCCCGATCGTGGAGGAATT	intergenic	An09g00350	GT	[G]	G/	GT/
IX	123889	GATCTCGGTCTGGTTGGAGC	5 prime UTR variant	An09g00630	CTGGTTGGAGCTG	[C]	C/	CTGGTTGGAGCTG/
IX	129993	TGCGATATCCAGGTTTCTGT	frameshift variant	An09g00640	CAG	[C]	CAG/	C/
IX	130109	CAATTATCAGACGAACGTTC	frameshift variant	An09g00640	GAC	[G]	GAC/	G/
IX	131429	ACGATAAAACCTTTAGGCTG	frameshift variant	An09g00640	C	[CAG]	C/	CAG/
IX	147906	TCTGTGGTTACAAAGGTAGT	intergenic	An09g00680	AC	[A]	AC/	A/
IX	313258	AGACGAGCTACAATAGGTAT	intergenic	An09g01450	A	[AACAGTGAGCCCCGACGCGGGTTTGGAGCATGTTGGCGGGAAGCTCGAAGGATCAGGATGC]	AACAGTGAGCCCCGACGCGGGTTTGGAGCATGTTGGCGGGAAGCTCGAAGGATCAGGATGC/	A/
IX	340125	ACTACTACTAAGCCAGAGCT	intergenic	An09g01580	A	[ACTACTACTACTACTACTACTACTACTACTACTACTACTACTACTACT]	ACTACTACTACTACTACTACTACTACTACTACTACTACTACTACTACT/	A/
IX	440718	GATTGACTGATCTTAAGAAG	disruptive inframe deletion	An09g02020	ATCT	[A]	ATCT/	A/
IX	443837	TTCAATCGAATGCTGGAGAA	frameshift variant	An09g02040	ATG	[A]	A/	ATG/
IX	642567	GTCTTTTTATCCTTTTATAC	intergenic	An09g02910	T	[TTTTTTTTTTTTTTTTCTTTTC, TTTTTTTTTTTTTTTTTTTTTTCTTTTC]	TTTTTTTTTTTTTTTTCTTTTC/	TTTTTTTTTTTTTTTTTTTTTTCTTTTC/
IX	652622	CTAATTAAACAAAACAAAAA	intergenic	An09g02940	C	[CGAAACCAAAAAAAAAAAAAAAAAA, CGAAACCAAAAAAAAAAAAAAAAAAAAAA]	CGAAACCAAAAAAAAAAAAAAAAAA/	CGAAACCAAAAAAAAAAAAAAAAAAAAAA/
IX	832529	GTACCATCACGCTTAATCAG	intergenic	An09g03660	C	[CT]	CT/	C/
IX	850237	TCCTGCTCACCTTTCGTGCC	frameshift variant	An09g03760	CCT	[C]	C/	CCT/
IX	855040	GGATAAACCTTTCTGTTTTT	intergenic	An09g03760	T	[TC]	T/	TC/
IX	1148101	GTGCCCTTTGTCTTAGACAT	frameshift variant	An09g05150	GTC	[G]	G/	GTC/
IX	1148196	CGGTTCTTCCCTGTCGTTCA	intergenic	An09g05120	C	[CCCCCCCAAA]	CCCCCCCAAA/	C/
IX	1148210	CGTTCACCAAGCTGTTTGAT	intergenic	An09g05120	AGCTG	[A]	A/	AGCTG/
IX	1506618	TTGGGGTTTTGGGGGGGGTA	intergenic	An09g06590	T	[TGGGGGGGGGGGGGGGGG, TGGGGGGGGGGGGGGGGGGGGGGG]	TGGGGGGGGGGGGGGGGG/	TGGGGGGGGGGGGGGGGGGGGGGG/
IX	1592452	GCTCCAAAACAAAAAAAAAA	intergenic	An09g06880	C	[CAAA, CAAAAAAAAAAAAAAAAAAAAAA]	CAAA/	CAAAAAAAAAAAAAAAAAAAAAA/
X	20835	AAGAAAAAAATAAAAGGGCT	intergenic	An10g00090	AT	[A]	AT/	A/
X	32149	TATATATAATCGTATATAAC	intergenic	An10g00160	TCG	[T]	T/	TCG/
X	44563	CCCGGCGTATCACAAAATCC	intergenic	An10e00200	T	[TCATTTTTGATGCCAC]	TCATTTTTGATGCCAC/	T/
X	44815	AGGATAATGACTACGCTAGC	intergenic	An10e00200	A	[AAT]	AAT/	A/
X	44817	GATAATGACTACGCTAGCAT	intergenic	An10e00200	TAC	[T]	T/	TAC/
X	44849	CTTGAAGCAGTTGTATGAGT	intergenic	An10e00200	G	[GCA]	GCA/	G/
X	183582	CAGGAAATTCCACAAAGGTT	intergenic	An10g00700	C	[CTG]	CTG/	C/
X	183588	ATTCCACAAAGGTTCTGTGA	intergenic	An10g00700	AGG	[A]	A/	AGG/
X	183718	TGGCCGGTCCAACTTGGAAC	intergenic	An10g00700	C	[CGG]	CGG/	C/
XI	64974	GCCAGTTGTCTTTTTTTTGA	3 prime UTR variant	An11g00210	C	[CTTTTTTTTTTTT, CTTTTTTTTTTTTTTTTTTTTTTTTTTTTTTTTTTTTTTTTTT]	CTTTTTTTTTTTT/	CTTTTTTTTTTTTTTTTTTTTTTTTTTTTTTTTTTTTTTTTTT/
XI	85811	AACCAAGGTAGTAAAAAAAA	intergenic	An11g00250	AGT	[A]	A/	AGT/
XI	169646	CGGGGAACTTGGGGGGGGGG	intergenic	An11g00650	TG	[T]	T/	TG/
XI	300240	TTCCAATTTACCCCCCATGC	intergenic	An11g01120	ACCCCCC	[A]	ACCCCCC/	A/
XI	336875	ATACAATACCAAAAAAAAAA	intergenic	An11g01300	C	[CAAAAAAAAAAAAAAAAAAAAAAAAAAAAAAAAAAAAAAAAAA]	CAAAAAAAAAAAAAAAAAAAAAAAAAAAAAAAAAAAAAAAAAA/	C/
XI	826695	GAGAAAAGAAGAAAAAAAAA	intergenic	An11g03300	AG	[A]	AG/	A/
XI	880734	CAAGCTGATAACTGCTGTAA	frameshift variant & splice region variant	An11g03560	A	[AT]	AT/	A/
XI	959365	TCCTGTCAGGCATACGTCTG	intergenic	An11g03890	G	[GTTCTATCGCTGGGGCACTTTACCGAACGT, GTTCTATCGCTGGGGCACTTTACCGAACGTCAT]	GTTCTATCGCTGGGGCACTTTACCGAACGT/	GTTCTATCGCTGGGGCACTTTACCGAACGTCAT/
XI	1037180	TACCAGGTGGACGGCAAGGT	frameshift variant	An11g04240	GAC	[G]	GAC/	G/
XI	1140739	TTTTTTTTTTTTTTTTTTTT	intergenic	An11g04610	T	[TC]	T/	TC/
XI	1199805	GTATAGGTTTGGGGGGATTA	frameshift variant	An11g04860	T	[TGGGGGGGTGGGGGGGGGGGGGGGGGGGGGGGGGGGGG]	T/	TGGGGGGGTGGGGGGGGGGGGGGGGGGGGGGGGGGGGG/
XI	1353379	CTTGAATGCCTTTCATCTCT	intergenic	An11g05530	CTTTCA	[C]	C/	CTTTCA/
XI	1353386	GCCTTTCATCTCTCTTTTAT	intergenic	An11g05530	C	[CCCT]	CCCT/	C/
XI	1353900	TCTCGAAGTCCTCCTTGAAC	intergenic	An11g05530	CCTCCTTG	[C]	C/	CCTCCTTG/
XI	1369696	TCGTGGTGTGGTTACACATC	intergenic	An11g05590	GGT	[G]	G/	GGT/
XI	1369765	AGACTCACTGTAACAGTTCA	intergenic	An11g05590	G	[GTAACC]	GTAACC/	G/
XI	1369797	ATTTACTGCTTACTATCCGT	intergenic	An11g05590	TTAC	[T]	T/	TTAC/
XI	1382906	ATGTATACCAGAATTGTTTC	intergenic	An11g05620	AGAATTG	[A]	AGAATTG/	A/
XI	1382922	TTTCTCCCACGACTGGCGAC	intergenic	An11g05620	C	[CA]	C/	CA/
XI	1479890	TTTTTGTTACTTTTTTTTTT	intergenic	An11g06000	C	[CTTTTTTTTTTT]	CTTTTTTTTTTT/	C/
XI	1731818	TTGGGTACCCCTTTTTGGTA	frameshift variant	An11g07150	CCTTT	[C]	C/	CCTTT/
XI	1800025	TCCGGGTCCCATAACAAGAC	disruptive inframe deletion	An11g07530	CATA	[C]	CATA/	C/
XI	1802578	CGTCCGCTCAGCCGTACTTA	intergenic	An11g07530	A	[ACGTGAGCAGCACCCATCCAGGTATTG]	ACGTGAGCAGCACCCATCCAGGTATTG/	A/
XI	1805369	AGAGAGAGAGAGAGAAAAAA	intergenic	An11g07530	GAGA	[G, GGA]	G/	GGA/
XI	1805372	GAGAGAGAGAGAAAAAAAAA	intergenic	An11g07530	AG	[A, *]	*/	A/
XI	1848091	ACTGTGGCCTAAAATGGTGT	frameshift variant & stop gained	An11g07730	T	[TGAGGATGACTAGAATATTGGGCCGGGAGCTGCTGG]	TGAGGATGACTAGAATATTGGGCCGGGAGCTGCTGG/	T/
XI	1952237	TTATTTTAATCAGTTATTTT	intergenic	An11g08200	T	[TGA]	TGA/	T/
XI	1952239	ATTTTAATCAGTTATTTTTA	intergenic	An11g08200	AGT	[A]	A/	AGT/
XI	1952278	ATAGTAGATAACTCAAGAAT	intergenic	An11g08200	AACTC	[A]	A/	AACTC/
XI	2028167	TTGTCGCAGGGGCTTTTTGA	intergenic	An11g08570	G	[GTTGCTGCGGGTCTCCAATCAAGACCATTATCCTAGTTGATGGCATGGTCAGGGCTATGGCAATTTCACCTTCCT]	GTTGCTGCGGGTCTCCAATCAAGACCATTATCCTAGTTGATGGCATGGTCAGGGCTATGGCAATTTCACCTTCCT/	G/
XI	2033017	TTGGGAGGGGGAGCATACAT	intergenic	An11g08610	G	[GGGGGGGGGGGGGGGGGT]	G/	GGGGGGGGGGGGGGGGGT/
XI	2050733	TTGGCTTGAGCTGGGATTTT	intergenic	An11g08650	GCT	[G]	G/	GCT/
XI	2082497	GACTGATACTCCGCAATAGT	intergenic	An11g08780	T	[TA]	T/	TA/
XI	2082523	CCGCTTGAAGTTTTTTTTTC	intergenic	An11g08780	GTTTTT	[G]	GTTTTT/	G/
XI	2082997	ACGGTATTTAAAAAAAGTTT	intergenic	An11g08780	A	[AT]	A/	AT/
XI	2138451	CTAGTTAACTACTAGTGAGG	intergenic	An11g09020	T	[TC]	T/	TC/
XI	2152678	TAGGTATAAAACATGATATA	intergenic	An11g09080	AAC	[A]	AAC/	A/
XI	2170527	GCTCCTCCGACACGGATCCA	frameshift variant	An11g09180	A	[ATC]	A/	ATC/
XI	2176870	TATGATATTGAGCGCCCCAA	frameshift variant	An11g09210	GA	[G]	GA/	G/
XI	2179356	CAAATTACTTCCAACGGTTC	intergenic	An11g09210	TCCAA	[T]	TCCAA/	T/
XI	2186161	TCATTCTCTCTCTCTCTCTT	intergenic	An11g09230	CTCTCTCTCTT	[C]	CTCTCTCTCTT/	C/
XI	2234513	TGAAGATGACAAGGGCGCAA	intergenic	An11g09380	C	[CTA]	CTA/	C/
XI	2234515	AAGATGACAAGGGCGCAATT	intergenic	An11g09380	AGG	[A]	A/	AGG/
XI	2310538	AGTCAAAGAGAAATAAAAAA	5 prime UTR variant	An11g09680	G	[GAAAAAAAA, GAAAAAAAAA]	GAAAAAAAA/	GAAAAAAAAA/
XI	2500906	CCTCCCCCTTCCCCCCCAAA	intergenic	An11g10410	T	[TCCCCCCCCCCCCCCCC, *]	TCCCCCCCCCCCCCCCC/	*/
XI	2653542	AACACCACCACCCCCCCCCC	intergenic	An11g11040	A	[C, ACCCCCCCCCCC]	ACCCCCCCCCCC/	C/
XII	16144	ATGCTTTCACAGAGAGAGAG	intergenic	An12g00050	C	[CAGAGAGAGAGAGAGAGAGAGAGAGAGAGAGAGAGAGAGAGAGAG, CAGAGAGAGAGAGAGAGAGAGAGAGAGAGAGAGAGAGAGAGAGAGAGAGAG]	CAGAGAGAGAGAGAGAGAGAGAGAGAGAGAGAGAGAGAGAGAGAG/	CAGAGAGAGAGAGAGAGAGAGAGAGAGAGAGAGAGAGAGAGAGAGAGAGAG/
XII	222360	TCTGGCTCCGGGAGAGCTTG	intergenic	An12g00820	G	[GAATA, GAGTA]	GAATA/	GAGTA/
XII	380879	TTCTCTCAACAAAAGTCATT	intergenic	An12g01380	CAAA	[C]	C/	CAAA/
XII	564409	GTATATAAGTAAAAAAAAAA	frameshift variant	An12g02150	TA	[T]	TA/	T/
XII	570350	GCAAAAGCTTGGTCGGCCAC	intergenic	An12g02160	TG	[T]	TG/	T/
XII	570377	GCACCGTGGTTGCTAATAAT	intergenic	An12g02160	T	[TC]	T/	TC/
XII	575826	AGCAGCTGAGCTCCCCTAAA	intergenic	An12g02200	G	[GCTCCGGTATTTTCAACTTCATCGTTGAACTTGACTCATATTAGATGGGAAATGCCTCGAATATCCTATTGATTCGATGAATGCTAGACTCGAATAAGCCGTTGTAGAGAGGTTTCGACTTGGGAATTGCCTGTGCGATCGCTCACC]	GCTCCGGTATTTTCAACTTCATCGTTGAACTTGACTCATATTAGATGGGAAATGCCTCGAATATCCTATTGATTCGATGAATGCTAGACTCGAATAAGCCGTTGTAGAGAGGTTTCGACTTGGGAATTGCCTGTGCGATCGCTCACC/	G/
XII	575895	ACCCGCACAGCTCCCACCCG	intergenic	An12g02200	GCTCC	[G]	G/	GCTCC/
XII	580566	TTCAAAATATACATAGTAAA	intergenic	An12e02230	T	[TTG]	TTG/	T/
XII	694077	GCCACCCCTTGGAAAGACAG	intergenic	An12g02710	TGG	[T]	T/	TGG/
XII	694080	ACCCCTTGGAAAGACAGCAT	intergenic	An12g02710	A	[AAG]	AAG/	A/
XII	694096	GCATTAAAGGTATCACACGA	intergenic	An12g02710	GT	[G]	G/	GT/
XII	770258	CATCCTCTGCATTCTCCTCA	conservative inframe deletion	An12g02960	CATT	[C]	C/	CATT/
XII	772091	TAGGAACTTTAACATGGTAA	intergenic	An12g02960	T	[TCTCC]	T/	TCTCC/
XII	788351	AAGCAAAGGTAGAGTTTATT	intergenic	An12g03030	TAGA	[T]	TAGA/	T/
XII	857217	CCGCTTGAAAGGATTGAGAA	intergenic	An12g03320	AG	[A]	A/	AG/
XII	882120	GACAATCGGGACTGATGCTG	frameshift variant	An12g03420	GA	[G]	GA/	G/
XII	913168	GGGTCTCTATANNNNNNNNN	intergenic	An12g03570	T	[TATCACTATTTGCTTGATGAACCAAACCTGCCCTCCGGGCAGATCCCTACAATTGCGCCATATGACAGCAACGACCCGGCTAACACGCCGGCGCAGGTGGTCTACCCTGCCCACAAGGTACAGTACGCGC]	TATCACTATTTGCTTGATGAACCAAACCTGCCCTCCGGGCAGATCCCTACAATTGCGCCATATGACAGCAACGACCCGGCTAACACGCCGGCGCAGGTGGTCTACCCTGCCCACAAGGTACAGTACGCGC/	T/
XII	970883	TCCACCTCAACCCCCCCCCC	intergenic	An12g03900	A	[ACCC, ACCCCCCCCCCCCCC]	ACCC/	ACCCCCCCCCCCCCC/
XII	1274007	TTCTTTTTTCTTTTTTTTTT	intergenic	An12g05080	C	[CTT]	CTT/	C/
XII	1285065	ATTTATGGCGTATGCACTTC	intergenic	An12g05150	G	[GCA]	G/	GCA/
XII	1285068	TATGGCGTATGCACTTCACA	intergenic	An12g05150	TGC	[T]	TGC/	T/
XII	1315324	GCAATGACTGGAGTTGTGGA	intergenic	An12g05320	G	[GAAGC]	G/	GAAGC/
XII	1315326	AATGACTGGAGTTGTGGAGT	intergenic	An12g05320	AGTTG	[A]	AGTTG/	A/
XII	1330592	AGCCGATTCCTTAGTTCAAC	intergenic	An12g05350	CT	[C]	C/	CT/
XII	1427315	ATAGCTAAGCTTTCTAAATG	intergenic	An12g05750	CT	[C]	C/	CT/
XII	1428670	TTATCTTAATATTTCTATGG	intergenic	An12g05750	TATTTCTATGGAA	[T]	T/	TATTTCTATGGAA/
XII	1428686	ATGGAATAGAAATACTTTCT	intergenic	An12g05750	AAATAC	[A, GAATAC]	A/	GAATAC/
XII	1428697	ATACTTTCTTCCCCCTTTTT	intergenic	An12g05750	TCCCCC	[T, CCCCCC]	T/	CCCCCC/
XII	1428704	CTTCCCCCTTTTTAGATTAG	intergenic	An12g05750	TTTTAGATTAGGTTTTTTTC	[T]	T/	TTTTAGATTAGGTTTTTTTC/
XII	1429186	TAATATTTCCTAAGAATAGC	intergenic	An12g05750	C	[CTT]	CTT/	C/
XII	1429785	GGCTTGATAGTCTTCTCTTC	frameshift variant	An12g05800	G	[GC]	GC/	G/
XII	1429814	ATCTGGTCTGTAATTTAGCG	frameshift variant	An12g05800	GTAAT	[G]	GTAAT/	G/
XII	1430316	GGTATTATATGGATGGCGTA	intergenic	An12g05770	TGG	[T]	T/	TGG/
XII	1430327	GATGGCGTATCCGTCTACAA	intergenic	An12g05770	TCCG	[T]	T/	TCCG/
XII	1430331	GCGTATCCGTCTACAAATTA	intergenic	An12g05770	TC	[T]	T/	TC/
XII	1430442	TTAGTATGGACTTTTTTTAT	intergenic	An12g05770	ACTTTT	[A]	A/	ACTTTT/
XII	1430450	GACTTTTTTTATAAATATCT	intergenic	An12g05770	T	[TCCTCC]	TCCTCC/	T/
XII	1430767	CTTCCGCGATGCGTATGCAG	intergenic	An12g05770	TGC	[T]	TGC/	T/
XII	1430946	GTAAATAGAACTTCATATTT	intergenic	An12g05770	AC	[A]	A/	AC/
XII	1431177	TATAATAGAACACACGGATT	intergenic	An12g05790	ACACACGG	[A]	A/	ACACACGG/
XII	1431838	TCTCTCTGTTCAGTCCTGTA	intergenic	An12g05790	TCAGTCCTG	[T]	T/	TCAGTCCTG/
XII	1431851	TCCTGTAATTGATTCTAGTT	intergenic	An12g05790	T	[TTTATAATCA]	TTTATAATCA/	T/
XII	1431852	CCTGTAATTGATTCTAGTTT	intergenic	An12g05790	GA	[G]	G/	GA/
XII	1432005	AATTTAGTAGCCGCCAATTA	intergenic	An12g05790	GCCGC	[G]	GCCGC/	G/
XII	1432054	TAGATAATTTTCTTGGAAAT	intergenic	An12g05790	T	[TCC]	TCC/	T/
XII	1433723	CTTGAATCTGGCGTAGCTGG	intergenic	An12g05790	GGC	[G, AGC]	G/	AGC/
XII	1433728	ATCTGGCGTAGCTGGCGAAG	intergenic	An12g05790	AGCTGGCG	[A]	A/	AGCTGGCG/
XII	1434076	GTGTCATTGGGCCCTGCTGC	intergenic	An12g05790	GGCCCTGC	[G]	G/	GGCCCTGC/
XII	1434396	GTAGCTAAGCTTTCTAAATG	intergenic	An12g05800	CT	[C]	C/	CT/
XII	1434604	ACGTGATGTATGGCCGTTCC	intergenic	An12g05800	A	[G, ACG]	G/	ACG/
XII	1518400	GAAAAAAATGAAAAAAAAAA	intergenic	An12g06210	G	[GAAAAAAAAAAAAAAAAAAAAAAAAAAAAAAAAAA, *]	*/	GAAAAAAAAAAAAAAAAAAAAAAAAAAAAAAAAAA/
XII	1549965	TTAATCAACCGGGAAAGACA	frameshift variant	An12g06430	C	[CT]	CT/	C/
XII	1549971	AACCGGGAAAGACATCAGTT	frameshift variant	An12g06430	AG	[A, CG]	A/	CG/
XII	1550120	AAACCGAAAAGGGCGTATGA	frameshift variant	An12g06430	AGG	[A]	AGG/	A/
XII	1552845	CCCTACCGGCCAACCGGACC	frameshift variant	An12g06430	CCA	[C]	CCA/	C/
XII	1553063	CGGAAGATTGGAGGGGCATT	frameshift variant	An12g06430	GGA	[G]	GGA/	G/
XII	1553070	TTGGAGGGGCATTCAACAAT	frameshift variant	An12g06430	C	[T, CGT]	T/	CGT/
XII	1745134	TATTACTTTCTAAAAAAAAA	intergenic	An12g07260	CTAAA	[C]	C/	CTAAA/
XII	1789577	CTATAGCCTCATGGAGATAT	intergenic	An12e07410	CATGGAG	[C]	C/	CATGGAG/
XII	2003303	GGGGAAAAACAAAAAAAAAA	intergenic	An12g08420	C	[CAAGAAAAAAAAAA]	C/	CAAGAAAAAAAAAA/
XII	2009722	ACATTGCCCGCCCCCCCTTG	frameshift variant	An12g08490	G	[GCCCCCCCCCCCCCCCCC]	GCCCCCCCCCCCCCCCCC/	G/
XII	2013666	AAAAGAAAAAAGAAAAAAAA	intergenic	An12g08480	AAG	[A]	AAG/	A/
XII	2013667	AAAGAAAAAAGAAAAAAAAA	intergenic	An12g08480	AG	[A, *]	A/	*/
XII	2061863	TCCACCCCCCAAAGCTTATA	intergenic	An12g08710	C	[CCCCCCCCCA, CCCCCCCCCCA]	CCCCCCCCCCA/	CCCCCCCCCA/
XII	2120651	AAAAAAGAAGAAAAAAAAAA	intergenic	An12g08900	G	[GAAAAAAAAAAAAAAAAAAAAAAAAAAAAA]	G/	GAAAAAAAAAAAAAAAAAAAAAAAAAAAAA/
XII	2130527	AACATCACCACCATCCTAAA	intergenic	An12g08940	A	[AAT]	A/	AAT/
XII	2155786	TGTTCTGTTCTTTTCTCTTT	frameshift variant	An12g09090	CTTTT	[C]	CTTTT/	C/
XII	2180057	CCTTTTTAGATTTTTTTTTT	frameshift variant	An12g09210	A	[ATTTTTTT]	A/	ATTTTTTT/
XII	2197868	GAGCTAGATAAAGACCCCGT	intergenic	An12g09340	A	[ATT]	A/	ATT/
XII	2299617	CGGATATAGAGGGTGACGAT	intergenic	An12g09810	A	[ATGTC]	ATGTC/	A/
XII	2299619	GATATAGAGGGTGACGATAG	intergenic	An12g09810	GGTGA	[G]	G/	GGTGA/
XII	2317107	TAGTTGAACCAAACATTCAT	intergenic	An12g09920	CA	[C]	CA/	C/
XII	2413572	CATTACAGAAAAGAACATCA	intergenic	An12g10350	A	[AAT]	A/	AAT/
XII	2466600	TTCTCGGCCTCCTCAAGGCT	frameshift variant	An12g10530	TC	[T]	TC/	T/
XII	2563409	GTAACTATATATAGTATTAA	intergenic	An12g10960	TA	[T]	T/	TA/
XII	2563427	AATTAAAAAAATCTTATATA	intergenic	An12g10960	AATC	[A]	A/	AATC/
XIII	42376	CGGTAAGAAGAAAAAAAAAA	intergenic	An13g00130	GAA	[G]	G/	GAA/
XIII	47589	CTATGTCGGCTTTTTTTTTT	intergenic	An13g00145	C	[CTTTTTTTTTTTTTTTTT]	C/	CTTTTTTTTTTTTTTTTT/
XIII	49542	GGTAAATGGATGTGTGTGTG	intergenic	An13g00180	A	[ATGTGTGTGTGTGTGTGTGTGTGTGTGTGTGTGTGTGTGTGTGTGTG]	ATGTGTGTGTGTGTGTGTGTGTGTGTGTGTGTGTGTGTGTGTGTGTG/	A/
XIII	124095	GACGGCAGGGTTTTTTTTTT	intergenic	An13g00480	G	[GATTTTTTTTTTTTTTTTTTTTTTTTTTTTT, GATTTTTTTTTTTTTTTTT]	GATTTTTTTTTTTTTTTTTTTTTTTTTTTTT/	GATTTTTTTTTTTTTTTTT/
XIII	332380	TTTTCGTCTTCCCCCCCCCC	5 prime UTR variant	An13g01320	T	[TCC, TCCCCCCCCCCCCCCCCC]	TCC/	TCCCCCCCCCCCCCCCCC/
XIII	487653	GATGCCGCAATTCTGACCGT	frameshift variant	An13g01990	A	[AC]	AC/	A/
XIII	487679	GAAGAAAGAGCAAGTCTTGG	frameshift variant	An13g01990	G	[GCA]	GCA/	G/
XIII	488274	TTCCACCGGGCTCGCGCCGG	frameshift variant	An13g01990	G	[GTT]	G/	GTT/
XIII	507799	AGGGGATGTCACTGCCGATG	frameshift variant	An13g02080	CA	[C]	C/	CA/
XIII	507921	GACCCATCGCGACCAATCAT	conservative inframe insertion	An13g02080	C	[CGGAAAA]	CGGAAAA/	C/
XIII	507945	GTAAGCTTGATTCGCGAACC	frameshift variant	An13g02080	AT	[A]	A/	AT/
XIII	508240	CAAATTCATCAAAGTCTCCC	frameshift variant	An13g02080	C	[CA]	CA/	C/
XIII	508578	AGCCCTCCTGCATTACGTTA	splice region variant & intron variant	An13g02080	G	[GCGCA]	G/	GCGCA/
XIII	508591	TACGTTAGTTAATCTTTTGG	intergenic	An13g02070	TAA	[T]	TAA/	T/
XIII	520249	CTCCCTCCTCCNNNNNNNNN	intergenic	An13g02110	C	[CCTATACTACACGGCCGACGAACCAGACGGCAAATCCAACCCGTTGAACTCAACCCGTCTCGCCTACGACCTCATCCGCTCCATGGACCCGTACCACCCTGTCTCT]	CCTATACTACACGGCCGACGAACCAGACGGCAAATCCAACCCGTTGAACTCAACCCGTCTCGCCTACGACCTCATCCGCTCCATGGACCCGTACCACCCTGTCTCT/	C/
XIII	588229	TCATGCTTCCCCGAGAAGTG	disruptive inframe deletion	An13g02430	CCCG	[C]	C/	CCCG/
XIII	588370	TGTCGGCGGGAACTTTGGGG	intergenic	An13e02440	G	[GT]	GT/	G/
XIII	589118	CAACTTCTTTTTCTTCTTCT	5 prime UTR variant	An13g02450	TTTCTTC	[T]	T/	TTTCTTC/
XIII	589184	TTTTAGTTGATTTCAGATAC	5 prime UTR variant	An13g02450	AT	[A]	A/	AT/
XIII	589205	GAAGCTAGAGCTCTTCGATA	5 prime UTR variant	An13g02450	GCTCT	[G]	G/	GCTCT/
XIII	618621	CTACCTTCAGAAGCAGACTT	intergenic	An13g02600	G	[GGA]	GGA/	G/
XIII	618623	ACCTTCAGAAGCAGACTTTC	intergenic	An13g02600	AGC	[A]	A/	AGC/
XIII	623534	TGCTGAAGCCCTCCACCAGG	conservative inframe insertion	An13g02630	C	[CTTT]	CTTT/	C/
XIII	732957	ATTGTTGACATGGGTTTATG	intergenic	An13g03160	ATGGGTT	[A]	A/	ATGGGTT/
XIII	779033	CAGAAATAGTCAGCATAATC	frameshift variant	An13g03430	T	[TTGGGA]	TTGGGA/	T/
XIII	779036	AAATAGTCAGCATAATCAGC	frameshift variant	An13g03430	GCATAA	[G]	G/	GCATAA/
XIII	779051	TCAGCGAGGCCGACGGCATT	frameshift variant	An13g03430	C	[CTTATT]	CTTATT/	C/
XIII	789157	GCCATTGAGTCGCAAGTGCG	frameshift variant	An13g03480	TCG	[T]	T/	TCG/
XIII	794018	TGTTTTGAATCCAAGCATAC	intergenic	An13g03480	TCC	[T]	T/	TCC/
XIV	303976	CATATCTCTAGTTTTATGGG	intergenic	An14g01080	AGT	[A]	AGT/	A/
XIV	303992	TGGGGTTCGATTATTTTTTC	intergenic	An14g01080	AT	[A]	AT/	A/
XIV	355196	GCAAGAAAGGACAAAGAAAA	intergenic	An14g01280	G	[GAAA]	GAAA/	G/
XIV	493787	TTTTTTTTTTTTGCTTCTTT	frameshift variant	An14g01920	T	[TTTTTTTTTTTTTTTTTTTTTTTTTTTC, TTTTTTTTTTTTTTTTTTTTTTTTTTTTTTTTTTTTTTTTC]	TTTTTTTTTTTTTTTTTTTTTTTTTTTC/	TTTTTTTTTTTTTTTTTTTTTTTTTTTTTTTTTTTTTTTTC/
XIV	700741	TCGCCAACAGCAGACGAGAC	frameshift variant start lost	An14g02840	GCAGACGAGACCATGA	[G]	G/	GCAGACGAGACCATGA/
XIV	700782	CAGTTTGTAGTAGGAATGAA	intergenic	An14g02820	GT	[G]	G/	GT/
XIV	700785	TTTGTAGTAGGAATGAACTA	intergenic	An14g02820	GGA	[G]	G/	GGA/
XIV	1066770	TTCTTTTCTTTTCTTTTTTT	intergenic	An14g04410	TTTC	[T]	TTTC/	T/
XIV	1104783	TATAGAAGGAGGGGGGGGGA	3 prime UTR variant	An14g04640	A	[AGG, AGGGGGG]	AGGGGGG/	AGG/
XIV	1105529	TTACCCCCCCGTCTCCTCCC	intergenic	An14g04630	CGTCTCCT	[C]	CGTCTCCT/	C/
XIV	1145204	CTGATCCTCAAGCCCGACAT	intergenic	An14g04790	A	[ACATACAACAAACGTGTACTCGCCCTCTGAAGTGCAGTATTGCCCTATGACTGACCGAGCTAGTATATGTGTCATGTGTGCAGCATAGAAAAAGTGCTTCCATATACGCTGAACTT]	A/	ACATACAACAAACGTGTACTCGCCCTCTGAAGTGCAGTATTGCCCTATGACTGACCGAGCTAGTATATGTGTCATGTGTGCAGCATAGAAAAAGTGCTTCCATATACGCTGAACTT/
XIV	1220951	TACCTTACATAAAAAGAAAA	intergenic	An14g05160	T	[TTGGGAAAAAAAAAAAAAAAAAAAAA, TTGGGAAAAAAAAAAAAAAAAAAAAAAAAA]	TTGGGAAAAAAAAAAAAAAAAAAAAA/	TTGGGAAAAAAAAAAAAAAAAAAAAAAAAA/
XIV	1225825	GGGGTTCGCTGGGGGGGTGG	intergenic	An14g05190	T	[TGGGGGGGGGG]	T/	TGGGGGGGGGG/
XIV	1297511	ATAACCACCCACCACCCCCC	intergenic	An14g05500	CA	[C]	CA/	C/
XIV	1297514	ACCACCCACCACCCCCCCCC	intergenic	An14g05500	CA	[C]	C/	CA/
XIV	1328444	GAAAGAAAAGAAAAAAAAAA	intergenic	An14g05690	G	[GAAAAAAAAAAAAAAAAAAAAAAAAAAAAAAAAAA]	GAAAAAAAAAAAAAAAAAAAAAAAAAAAAAAAAAA/	G/
XV	31206	GGGGGGGGGGAAGTTTGGGG	intergenic	An15g00120	GAA	[G]	GAA/	G/
XV	542170	TTTAAAATGGGAAATTTGGC	intergenic	An15g02010	GGA	[G]	GGA/	G/
XV	592671	GTGTGTTTTACACCTGTATA	intergenic	An15g02210	A	[ACAC]	ACAC/	A/
XV	652077	ACCAGTCGAAGGGGTTCTCA	frameshift variant	An15g02540	AG	[A]	A/	AG/
XV	652157	GTACGTCTTAATATTGGTTC	intergenic	An15g02510	A	[AAG]	AAG/	A/
XV	652609	GGGCAGTTGGAGGGTGGAAA	intergenic	An15g02510	GA	[G]	GA/	G/
XV	655509	AGGAAATTTGTATGTTACTA	intergenic	An15g02540	GT	[G]	G/	GT/
XV	655530	TAATGAGAATGAAAACTTTT	intergenic	An15g02540	TGA	[T]	T/	TGA/
XV	669864	GGTGGGTCGCGATGGCAGAA	disruptive inframe deletion	An15g02640	CGAT	[C]	C/	CGAT/
XV	670203	GATCTGAGGGACTTGGTTTA	frameshift variant	An15g02640	GA	[G]	GA/	G/
XV	999692	GTTCCTCACCTAAAAAAAGA	intergenic	An15g04190	C	[CCACAAAAAAAAAAAAAAAAAAAAAAAAAAAAAAAAAAAAA]	C/	CCACAAAAAAAAAAAAAAAAAAAAAAAAAAAAAAAAAAAAA/
XV	1070177	GTAGTAAGATATCACAACAT	intergenic	An15g04540	T	[TGA]	TGA/	T/
XV	1233644	GGCGCGATATCTCCCACTCC	intergenic	An15g05210	TC	[T]	TC/	T/
XV	1649771	CTGGTTATCCAGAATTAATA	intergenic	An15g06925	C	[CTT]	C/	CTT/
XV	1655999	GTAAGCGTATAATCAAAGAT	intergenic	An15g06950	T	[TAATTAAAAATC]	TAATTAAAAATC/	T/
XV	1806542	ATGGCCGTCTTGCAATGAGC	frameshift variant	An15g07650	TTGCAA	[T]	TTGCAA/	T/
XVI	15157	AAAAAAAAAAAGATGAGAAA	intergenic	An16g00060	A	[AT]	A/	AT/
XVI	19701	GGCCGTGGTCTCAACCCTTG	3 prime UTR variant	An16g00080	C	[CACCTCGCTGTTACGAACTGCCGCATGTCTGCTCCATGTAGGCAAGTAGTCAGGACGGGTGGAGGAGAAA, CACCTCGCTGTTACGAACTGCCGCATGTCTGCTCCATGTAGGCAAGTAGTCAGGACGGGTGGAGGAGAAATATTAGCA]	CACCTCGCTGTTACGAACTGCCGCATGTCTGCTCCATGTAGGCAAGTAGTCAGGACGGGTGGAGGAGAAA/	CACCTCGCTGTTACGAACTGCCGCATGTCTGCTCCATGTAGGCAAGTAGTCAGGACGGGTGGAGGAGAAATATTAGCA/
XVI	102841	ACACTAGGGCTAGTGCTTAT	intergenic	An16g00520	C	[CT]	C/	CT/
XVI	128303	GGCTCCAACCTTTTCTTCCA	intergenic	An16g00650	CT	[C]	CT/	C/
XVI	345478	TTTTGATGAGTAATCACCTG	intergenic	An16g01600	G	[GAGTCTCATGTGTAACATGGTTGCAATCGTAGGATTGACTTTGAGCGGGATTAGTC]	GAGTCTCATGTGTAACATGGTTGCAATCGTAGGATTGACTTTGAGCGGGATTAGTC/	G/
XVI	447452	AAAAAAAAAAAAAGAAAAAA	intergenic	An16g02020	AAAAG	[A]	A/	AAAAG/
XVI	623308	GAACATGATGTTTTTTTTTT	intergenic	An16g02850	G	[GGTTTTTTTTTTTTTTT, GGTTTTTTTTTTTTTT]	GGTTTTTTTTTTTTTTT/	GGTTTTTTTTTTTTTT/
XVI	798971	GATGAGTTGCTTTTTTTTTT	intergenic	An16g03570	C	[CTTTTTTTTTTTTTTTTTTTTTTTTTT]	C/	CTTTTTTTTTTTTTTTTTTTTTTTTTT/
XVI	1328146	TTGTCAAGTTATGGGCGGTT	intergenic	An16g05940	T	[TG]	T/	TG/
XVI	1328160	GCGGTTAGCTTGTATGTGAC	frameshift variant	An16g05960	T	[TTA]	T/	TTA/
XVI	1478467	ATACCCAGTGTTTTCGCGAG	intergenic	An16g06700	GT	[G]	G/	GT/
XVI	1478562	ACTCCGATCCATAGTAACTG	disruptive inframe deletion	An16g06690	CATA	[C]	C/	CATA/
XVI	1483579	TATGTGGAGACAAAGGTTTT	intergenic	An16g06690	A	[AC]	A/	AC/
XVI	1483585	GAGACAAAGGTTTTCTTCCT	intergenic	An16g06690	G	[GA]	G/	GA/
XVI	1483591	AAGGTTTTCTTCCTTCAGAA	intergenic	An16g06690	TTC	[T]	TTC/	T/
XVI	1483619	CTCTGCCAACTCTGGGTGCA	intergenic	An16g06690	C	[CAATA]	C/	CAATA/
XVI	1483767	TCTTGCTCTCTCCTGTCCTG	intergenic	An16g06690	C	[CTTT]	C/	CTTT/
XVI	1529079	GTAGGCTTTGCCATCTTAGC	intergenic	An16g06780	GCCATCTTAGCTGGACGGATA	[G]	GCCATCTTAGCTGGACGGATA/	G/
XVI	1539856	TTAAAAAAAAAAAAGAAAAA	intergenic	An16g06810	AAAAAG	[A]	A/	AAAAAG/
XVI	1578333	GGTGGTGCCCGCGACANNNN	disruptive inframe insertion	An16g07040	C	[CGCGACGACGGAGGTGGTGTCGGAGACGGTCACGGTAGCAGCGGGGATAGTGTAGACACCAGTCGAGGAGAAGGTGGTGGTCTCCGGGGTGGGAACAGCCTGGCTGGAGGTGGTAACAGCA]	C/	CGCGACGACGGAGGTGGTGTCGGAGACGGTCACGGTAGCAGCGGGGATAGTGTAGACACCAGTCGAGGAGAAGGTGGTGGTCTCCGGGGTGGGAACAGCCTGGCTGGAGGTGGTAACAGCA/
XVI	1787929	AAATGAGAATAAAAAAAAAA	intergenic	An16g07910	T	[TCAAAAAAAAAAAAAAAAAAAAAAAAAAAAAAAA, TCAAAAAAAAAAAAAAAAAAAAAAAAAAAAAAAAAAAA]	TCAAAAAAAAAAAAAAAAAAAAAAAAAAAAAAAA/	TCAAAAAAAAAAAAAAAAAAAAAAAAAAAAAAAAAAAA/
XVI	1928834	CTACTAGATAGGGTGTATGT	intergenic	An16g08500	A	[AGGGGGGGGGGGG, AGGGGGGGGGGGGG]	AGGGGGGGGGGGG/	AGGGGGGGGGGGGG/
XVI	2003310	CTCCGCCGCAANNNNNNNNN	intergenic	An16g08830	A	[AATCTTCCGCCCACCACAACCACCACCTTCACCCCATTTTCACCTTCACCCCCGGCTGGGTTGATCCTTGCAGGCAATTAATTGACAACTGCAAGTCCATTCGTTCATTGCATCTATCGCGAGC]	AATCTTCCGCCCACCACAACCACCACCTTCACCCCATTTTCACCTTCACCCCCGGCTGGGTTGATCCTTGCAGGCAATTAATTGACAACTGCAAGTCCATTCGTTCATTGCATCTATCGCGAGC/	A/
XVI	2063793	ACGTTATCCGCCGCCCCCCC	3 prime UTR variant	An16g09070	G	[GCCCCCCCCCCCCCCCCCCCCCCCCCCCCCCC, GCCCCCCCCCCCCCCCCCCCCCCCCCCCCCCCCC]	GCCCCCCCCCCCCCCCCCCCCCCCCCCCCCCC/	GCCCCCCCCCCCCCCCCCCCCCCCCCCCCCCCCC/
XVI	2064792	CATGAAAGAAGGGAGGGGGG	intergenic	An16g09050	A	[AGGGGGGG]	AGGGGGGG/	A/
XVI	2074820	TTTCTTTTCTTTTTCCATTA	intergenic	An16g09110	T	[TTTTTC, TTTTCTTTTTC]	TTTTTC/	TTTTCTTTTTC/
XVII	24556	CTAGCATTAATTCAATGGGA	frameshift variant	An17g00140	AT	[A]	AT/	A/
XVII	209661	CAACACAAACANNNNNNNNN	intergenic	An17g00860	C	[CACCTACCGCAGTCTCTACGCCCCAACCAACACAACCATGACCTCCCTCGCCCACCACCTCGCCAACAACCTCGACGACAGCCACCACGGCCGTCTGCGCGCGCGCCGCTCTCCCTCCAAATAT]	CACCTACCGCAGTCTCTACGCCCCAACCAACACAACCATGACCTCCCTCGCCCACCACCTCGCCAACAACCTCGACGACAGCCACCACGGCCGTCTGCGCGCGCGCCGCTCTCCCTCCAAATAT/	C/
XVII	220902	ATAATAAGTGTACAGCTATC	intergenic	An17g00910	G	[GTACGGAA]	GTACGGAA/	G/
XVII	220921	CTGGATCTTATCTTAATATG	intergenic	An17g00910	ATCT	[A]	A/	ATCT/
XVII	349484	TCTTTCTTTCTCTATATATA	intergenic	An17g01450	C	[CTTTCTTTCTTTCTTTCTTTCTTTCTT]	C/	CTTTCTTTCTTTCTTTCTTTCTTTCTT/
XVIII	35452	TTCCACAAAGAAAGGCTCTC	intergenic	An18g00160	G	[GA]	G/	GA/
XVIII	41086	TTTGACTGCTCGGACGGCTG	frameshift variant	An18g00210	TCGGACGGCTGG	[T]	T/	TCGGACGGCTGG/
XVIII	41098	GACGGCTGGTCTTTTTAAAA	stop gained & conservative inframe insertion	An18g00210	T	[TAAATAATTA]	TAAATAATTA/	T/
XVIII	114097	CCTTGACAGCGGGGGCCCAG	frameshift variant	An18g00520	C	[CAG]	CAG/	C/
XVIII	114102	ACAGCGGGGGCCCAGCTCTG	frameshift variant	An18g00520	GCC	[G]	G/	GCC/
XVIII	120688	TGCTAGTTTGCGCATTTGAT	intergenic	An18g00520	G	[GTA]	GTA/	G/
XVIII	120751	ATTTCAACCCATGATCAGAG	intergenic	An18g00520	CATGA	[C]	C/	CATGA/
XVIII	120775	TATGAATAGATACATATAAA	intergenic	An18g00520	ATACAT	[A]	A/	ATACAT/
XVIII	121344	CTATTCAAGCGGGGAAAGAG	frameshift variant	An18g00540	C	[CTA]	C/	CTA/
XVIII	121347	TTCAAGCGGGGAAAGAGGTC	frameshift variant	An18g00540	GGA	[G]	GGA/	G/
XVIII	267874	TGAAAGACATGTGGACTTTG	intergenic	An18g01350	T	[TATCAATACAAGAAGGTGCGCCCATGGAGCGAAAAAAACACCAAGGACGAAACAGAAGCCAGGAAAACAATATACAGAACTTTTCGATGAAA]	T/	TATCAATACAAGAAGGTGCGCCCATGGAGCGAAAAAAACACCAAGGACGAAACAGAAGCCAGGAAAACAATATACAGAACTTTTCGATGAAA/
XVIII	299396	GTAAGATTAGTAGAAGCCTT	intergenic	An18g01490	G	[GTAT]	G/	GTAT/
XVIII	345540	ATAAATTTCCTTGGTGGGCT	intergenic	An18g01700	C	[CGTGA]	CGTGA/	C/
XVIII	345545	TTTCCTTGGTGGGCTTACAT	intergenic	An18g01700	TGGGC	[T]	T/	TGGGC/
XVIII	355906	TTGATGACTGTTTTTTTTTT	splice region variant & intron variant	An18g01770	G	[GTTTTTTTTTTT, GTTTTTTTTTTTTTTTTTTTTTTTTTTT]	GTTTTTTTTTTT/	GTTTTTTTTTTTTTTTTTTTTTTTTTTT/
XVIII	594927	CAGACAGAGCACAATGCAGA	frameshift variant	An18g02760	C	[CATCGT]	CATCGT/	C/
XVIII	594940	ATGCAGATAATCCTGTATGC	frameshift variant	An18g02760	ATC	[A]	A/	ATC/
XVIII	598163	AATAGAATCCTAAATCCAGT	intergenic	An18g02760	CTA	[C]	CTA/	C/
XVIII	598198	ACCTTTACTTCCCCTCCTAT	intergenic	An18g02760	TC	[T]	TC/	T/
XVIII	761196	AGGTATTTTTAATAGTGACT	intergenic	An18g03410	T	[TG]	TG/	T/
XVIII	761207	ATAGTGACTTGGACCGGTAT	intergenic	An18g03410	TGGAC	[T]	T/	TGGAC/
XVIII	813019	TAGCTTGTTTAAAAAGGTAA	intergenic	An18g03630	T	[TGG]	TGG/	T/
XVIII	813023	TTGTTTAAAAAGGTAACTAT	intergenic	An18g03630	AAG	[A]	A/	AAG/
XVIII	813050	TAATTGACATGCACATCTTG	intergenic	An18g03630	TGC	[T]	T/	TGC/
XVIII	813073	TCCACTCATAAAACCATAAT	intergenic	An18g03630	A	[AT]	AT/	A/
XVIII	983839	TATACGGTCTANNNNNNNNN	intergenic	An18g04210	T	[TATGCTTGGTTTCGGCCACATAGTCTCATACATACATACACCATGACTTGTGTTTCATTGTAAGACCGCCCAAGTAGTACTATATGCTAACTGAAGGTAGTATGATATGCGAGCCCGAAATAAACA, TATGCTTGGTTTCGGCCACATAGTCTCATACATACATACACCATGACTTGTGTTTCATTGTAAGACCGCCCAAGTAGTACTATATGCTAACTGAAGGTAGTATGATATGCGAGCCCG]	TATGCTTGGTTTCGGCCACATAGTCTCATACATACATACACCATGACTTGTGTTTCATTGTAAGACCGCCCAAGTAGTACTATATGCTAACTGAAGGTAGTATGATATGCGAGCCCGAAATAAACA/	TATGCTTGGTTTCGGCCACATAGTCTCATACATACATACACCATGACTTGTGTTTCATTGTAAGACCGCCCAAGTAGTACTATATGCTAACTGAAGGTAGTATGATATGCGAGCCCG/
XVIII	1139313	TTTGGGGCTATCATTTGTAG	intergenic	An18g04850	ATCATTT	[A]	A/	ATCATTT/
XVIII	1139373	GTGGTTCTGGAGTAATCGTC	intergenic	An18g04850	GA	[G]	G/	GA/
XVIII	1139465	CTGCCCGCTGAGTGGTTAGG	conservative inframe deletion	An18g04900	GAGT	[G]	G/	GAGT/
XVIII	1203050	AAAAGAAAAGAAAAAAAAAA	intergenic	An18g05250	GAAAAAAAAAAAAAAAAAAAAAAAAAAAAAAAA	[G]	GAAAAAAAAAAAAAAAAAAAAAAAAAAAAAAAA/	G/
XIX	650	TACTATCTTTGCAAGGACTA	intergenic	An19g00010	TGCAAGGACTATAAGAA	[T]	T/	TGCAAGGACTATAAGAA/
XIX	2431	ACTTTCGGGCCTGGACAAGG	intergenic	An19e00020	C	[CTTAAAT, CAAAT]	CTTAAAT/	CAAAT/
XIX	2859	TAATAATTTTTTTCCGGATT	intergenic	An19e00020	T	[TTC]	TTC/	T/
XIX	2862	TAATTTTTTTCCGGATTCTA	intergenic	An19e00020	TCC	[T]	T/	TCC/
XIX	3224	TGCTGGCTGCTAGCCGGAAA	intergenic	An19e00020	C	[CTGATTAT]	C/	CTGATTAT/
XIX	4578	TGGGTAGAGGATAGACTAGT	conservative inframe insertion	An19g00010	G	[GGTGTCTGCGCAAGCCCATCCGCTTACTCAC]	G/	GGTGTCTGCGCAAGCCCATCCGCTTACTCAC/
